# Supplementary material for: Organocatalyzed cascade reactions of carbohydrates – a direct access to C-glycosides
Source: Royal Society of Chemistry journal article supplement (doi:10.1039/c3cc48120d), 2013-11-13

# Supporting Informations

## **Organocatalyzed Cascade Reactions of Carbohydrates – A Direct Access to C-Glycosides**

Benjamin Voigt and Rainer Mahrwald  
Department of Chemistry, Humboldt-University  
Berlin, Brook-Taylor Str. 2, Germany

[rainer.mahrwald@rz.hu-berlin.de](mailto:rainer.mahrwald@rz.hu-berlin.de)

### Determination of Configuration

The relative and absolute configuration of the new generated stereocenters was assigned by analysis of nO-interactions of H-Atoms at stereocenters introduced by the employed carbohydrate. The relevant interactions observed in NOESY-experiments are depicted as arrows in the following scheme.

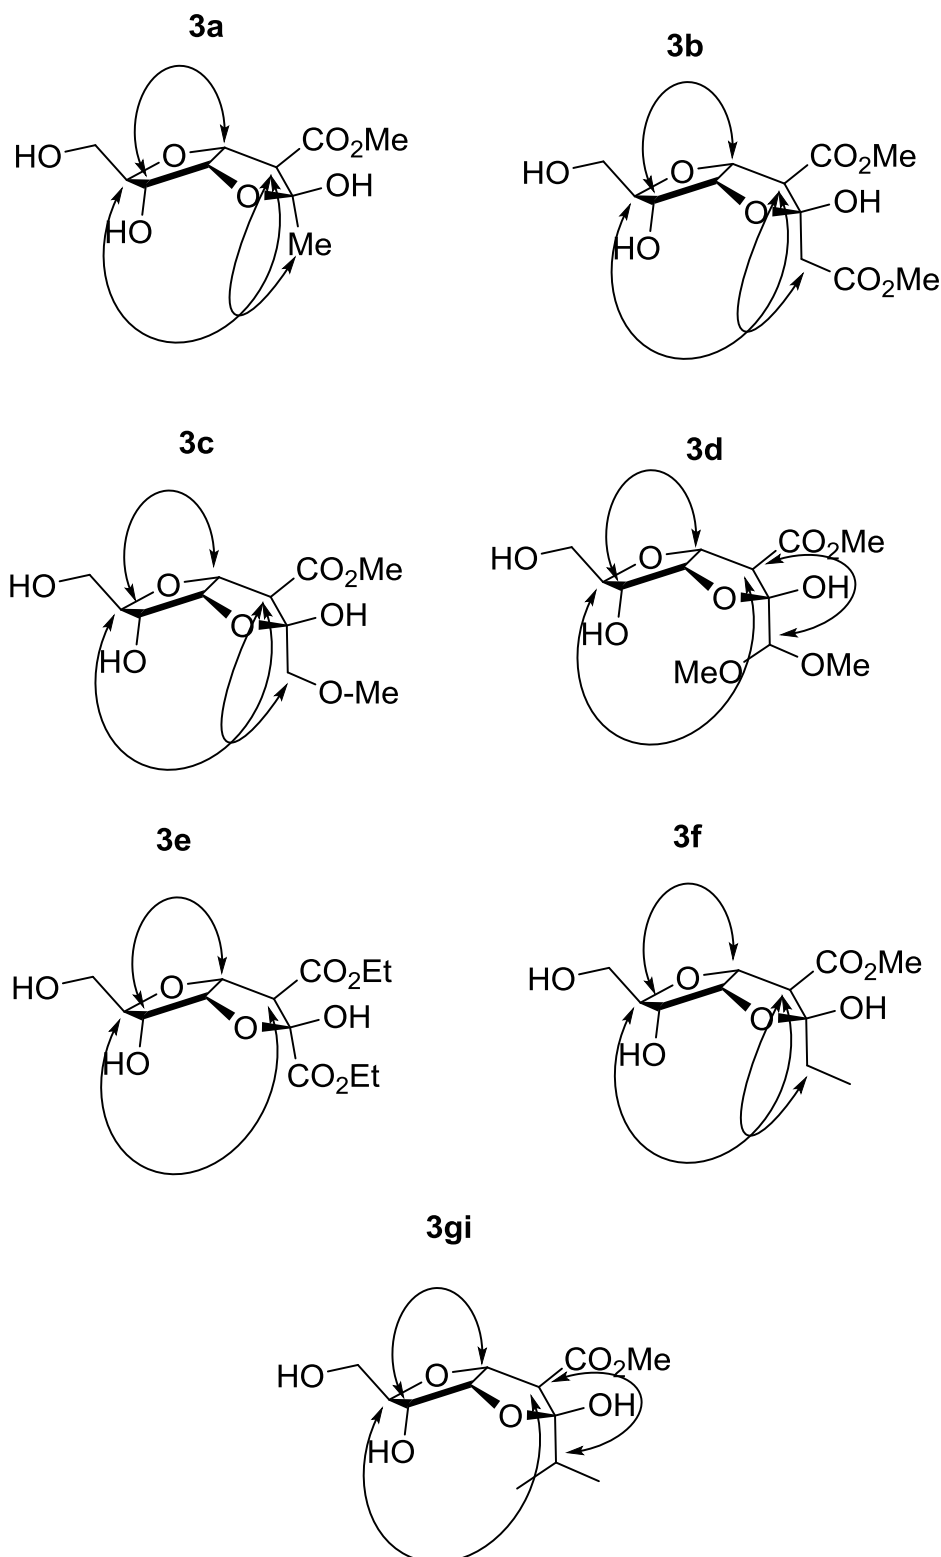

**ara-4b**

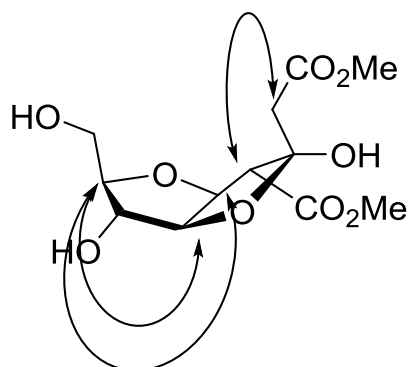

**xylo-5b**

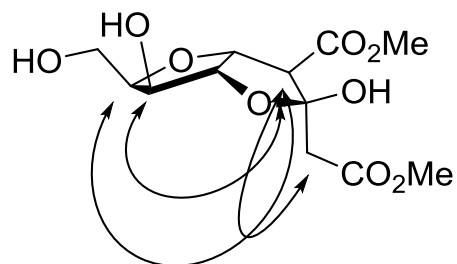

**gluco-6b**

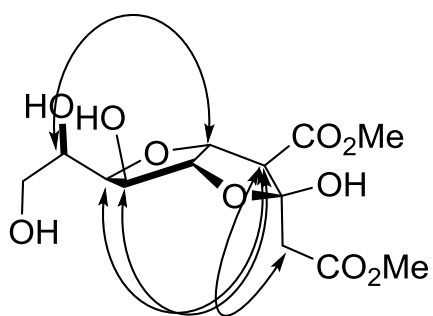

**galacto-7b**

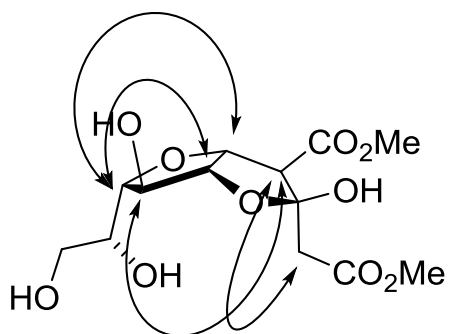

## Experimental Procedures

$^1\text{H}$  – NMR,  $^{13}\text{C}$ -NMR and correlation experiments were carried out at 500 MHz and 125 MHz. Chemical shifts are given in ppm. Purification of products was accomplished by flash chromatography using silica (Merck silica gel 60, particle size 0.04 - 0.063 mm) with a solvent mixture of DCM/MeOH 95:5 to 9:1.

Substances were purchased from Aldrich, TCI and ACROS and used without further purification. Substance **2d** was synthesized according to N.E. Norris<sup>[1]</sup>.

## General procedures

150 mg (1 mmol, 1 eq) of the pentoses **1a - c** (180 mg (1 mmol, 1 eq) of the hexoses **1d - e**), (1.2 mmol, 1.2 eq) of the  $\beta$ -keto ester **2**, 23 mg (0.2 mmol, 0.2 eq) of L-proline and 15 mg (0.1 mmol, 0.1 eq) DBU were dissolved in 0.5 ml DMF and the reaction mixture was stirred for 72 h at room temperature. The mixture was purified by silica flash chromatography, using solvent mixtures of dichlormethane/ methanol (95:5 to 9:1). The products were isolated as colourless oils.

## Characterization of Products

methyl (2S,3R,3aR,5R,6R,6aR)-2,6-dihydroxy-5-(hydroxymethyl)-2-methylhexahydrofuro[3,2-b]furan-3-carboxylate (**3a**)

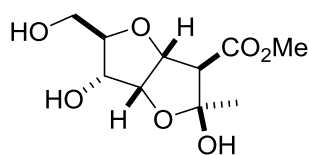

Yield: 67%

$^1\text{H}$  NMR (500 MHz, Methanol- $d_4$ )  $\delta$  5.26 (dd,  $J$  = 5.3, 4.3 Hz, 1H), 4.60 (t,  $J$  = 5.3 Hz, 1H), 3.88 (dd,  $J$  = 8.9, 5.4 Hz, 1H), 3.80 (dd,  $J$  = 12.1, 2.3 Hz, 1H), 3.72 (s, 3H), 3.70 – 3.65 (m, 1H), 3.59 (dd,  $J$  = 12.0, 5.1 Hz, 1H), 2.97 (d,  $J$  = 4.3 Hz, 1H), 1.68 (s, 3H).

$^{13}\text{C}$  NMR (125 MHz, Methanol- $d_4$ )  $\delta$  171.16, 107.51, 85.22, 81.65, 80.89, 72.51, 63.01, 62.18, 52.47, 25.95.

HRMS: calcd. for  $\text{C}_{10}\text{H}_{15}\text{O}_7^-$  : 247.0823, found: 247.0825

$[\alpha]_{\text{D}}^{25^\circ\text{C}} = +129$  (C=1, MeOH)

methyl (2S,3R,3aR,5R,6R,6aR)-2,6-dihydroxy-5-(hydroxymethyl)-2-(2-methoxy-2-oxoethyl)hexahydrofuro[3,2-b]furan-3-carboxylate (**3b**)

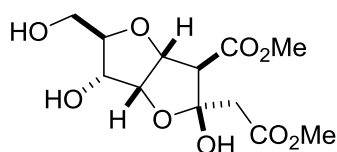

Yield: 86%

$^1\text{H}$  NMR (500 MHz, Methanol- $d_4$ )  $\delta$ = 5.30 (dd,  $J$  = 5.3, 4.2 Hz, 1H), 4.66 (t,  $J$  = 5.4 Hz, 1H), 3.92 (dd,  $J$  = 8.9, 5.5 Hz, 1H), 3.83 (dd,  $J$  = 12.2, 2.4 Hz, 1H), 3.75 (s, 3H), 3.73 (s, 3H), 3.74 (dd,  $J$  = 11.0, 7.5, 1H), 3.62 (ddd,  $J$  = 5.8, 2.6, 1.3 Hz, 1H), 3.62 (d,  $J$  = 4.0 Hz, 1H), 3.11 (d,  $J$  = 15.6 Hz, 1H), 3.02 (d,  $J$  = 15.5 Hz, 1H).

$^{13}\text{C}$  NMR (125 MHz, Methanol- $d_4$ )  $\delta$ = 172.03, 170.83, 106.20, 84.47, 81.89, 81.19, 72.44, 62.04, 60.22, 52.58, 52.37, 49.85, 42.58.

HRMS-ESI: calcd. for  $\text{C}_{12}\text{H}_{17}\text{O}_9^-$  : 305.0878, found: 305.0878

$[\alpha]_{\text{D}}^{25^\circ\text{C}} = +79$  ( $C=1$ , MeOH)

methyl (2R,3R,3aR,5R,6R,6aR)-2,6-dihydroxy-5-(hydroxymethyl)-2-(methoxymethyl)hexahydrofuro[3,2-b]furan-3-carboxylate (**3c**)

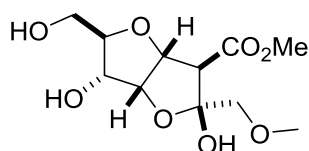

Yield: 84%

$^1\text{H}$  NMR (500 MHz, Methanol- $d_4$ )  $\delta$ = 5.28 (dd,  $J$  = 5.4, 4.3 Hz, 1H), 4.67 (dd,  $J$  = 5.4 Hz, 1H), 3.87 (dd,  $J$  = 8.7, 5.3 Hz, 1H), 3.79 (dd,  $J$  = 12.1, 2.3 Hz, 1H), 3.72 (s, 3H), 3.71 (dd,  $J$  = 10.6, 7.5 Hz, 1H), 3.63 (d,  $J$  = 10.4 Hz, 1H), 3.60 (d,  $J$  = 11.5 Hz, 1H), 3.58 (dd,  $J$  = 12.1, 5.0 Hz, 1H), 3.48 (s, 3H), 3.33 (d,  $J$  = 4.3 Hz, 1H).

$^{13}\text{C}$  NMR (125 MHz, Methanol- $d_4$ )  $\delta$ =  $\delta$  170.95, 107.90, 84.61, 82.02, 82.02, 74.98, 72.89, 62.21, 59.93, 57.97, 52.52.

HRMS-ESI: calcd. for  $\text{C}_{11}\text{H}_{17}\text{O}_8^-$  : 277.0929, found: 277.0930

$[\alpha]_{\text{D}}^{25^\circ\text{C}} = +90$  ( $C=1$ , MeOH)

methyl (2R,3R,3aR,5R,6R,6aR)-2-(dimethoxymethyl)-2,6-dihydroxy-5-(hydroxymethyl)hexahydrofuro[3,2-b]furan-3-carboxylate (**3d**)

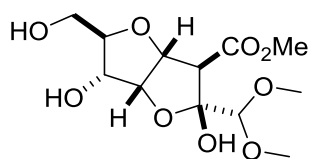

Yield: 36%

$^1\text{H}$  NMR (500 MHz, Methanol- $d_4$ )  $\delta$  = 5.19 (dd,  $J$  = 5.3, 4.0 Hz, 1H), 4.68 (t,  $J$  = 5.3 Hz, 1H), 3.87 (dd,  $J$  = 8.7, 5.3 Hz, 1H), 3.79 (dd,  $J$  = 12.2, 2.4 Hz, 1H), 3.73 – 3.70 (m, 1H), 3.72 (s, 3H), 3.60 (s, 3H), 3.58 (s, 3H), 3.58 (dd,  $J$  = 12.2, 5.2 Hz, 1H), 3.32 (d,  $J$  = 4.1 Hz, 1H).

$^{13}\text{C}$  NMR (125 MHz, Methanol- $d_4$ )  $\delta$  = 171.18, 108.16, 106.98, 84.61, 82.24, 82.17, 73.03, 62.21, 58.69, 58.12, 52.57.

HRMS-ESI: calcd. for  $\text{C}_{12}\text{H}_{19}\text{O}_9$ : 307.1035, found: 307.1035

$[\alpha]_{\text{D}}^{25^\circ\text{C}}$  = +38 (C=1, MeOH)

diethyl (2R,3R,3aR,5R,6R,6aR)-2,6-dihydroxy-5-(hydroxymethyl)hexahydrofuro[3,2-b]furan-2,3-dicarboxylate (**3e**)

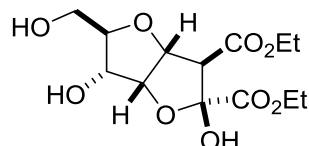

Yield: 37%

$^1\text{H}$  NMR (500 MHz, Methanol- $d_4$ )  $\delta$  = 5.26 (dd,  $J$  = 5.3, 4.1 Hz, 1H), 4.73 (t,  $J$  = 5.3 Hz, 1H), 4.20 – 4.11 (m, 4H), 3.93 (dd,  $J$  = 8.8, 5.2 Hz, 1H), 3.83 (dd,  $J$  = 12.1, 2.3 Hz, 1H), 3.78 (ddd,  $J$  = 9.0, 4.9, 2.3 Hz, 1H), 3.67 (d,  $J$  = 4.1 Hz, 1H), 3.60 (dd,  $J$  = 12.1, 4.9 Hz, 1H), 1.35 (t,  $J$  = 7.1 Hz, 3H), 1.22 (t,  $J$  = 7.1 Hz, 3H).

$^{13}\text{C}$  NMR (125 MHz, Methanol- $d_4$ )  $\delta$  = 169.83, 169.43, 104.67, 83.84, 83.28, 81.81, 72.58, 63.43, 62.15, 61.40, 14.36.

HRMA-ESI: calcd. for  $\text{C}_{13}\text{H}_{24}\text{O}_9\text{N}^+$ : 338.1446, found: 338.1447

$[\alpha]_{\text{D}}^{25^\circ\text{C}}$  = -39 (C=1, MeOH)

methyl (2S,3R,3aR,5R,6R,6aR)-2-ethyl-2,6-dihydroxy-5-(hydroxymethyl)hexahydrofuro[3,2-b]furan-3-carboxylate (**3f**)

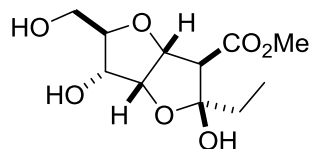

Yield: 62%

$^1\text{H}$  NMR (500 MHz, Methanol- $d_4$ )  $\delta$  5.23 (dd,  $J$  = 5.1, 3.9 Hz, 1H), 4.63 (t,  $J$  = 5.2 Hz, 1H), 3.90 (dd,  $J$  = 9.0, 5.2 Hz, 1H), 3.81 (dd,  $J$  = 12.1, 2.3 Hz, 1H), 3.71 (s, 3H), 3.69 (ddd,  $J$  = 9.0, 5.0, 2.3 Hz, 1H), 3.58 (dd,  $J$  = 12.1, 5.0 Hz, 1H), 3.08 (d,  $J$  = 3.9 Hz, 1H), 1.97 (qd,  $J$  = 7.5, 2.4 Hz, 2H), 1.07 (t,  $J$  = 7.5 Hz, 3H).

$^{13}\text{C}$  NMR (125 MHz, Methanol- $d_4$ )  $\delta$  171.34, 109.74, 85.22, 81.88, 81.13, 72.74, 62.22, 60.04, 52.43, 32.41, 8.74.

HRMS-ESI: calcd for  $\text{C}_{11}\text{H}_{17}\text{O}_7^-$  : 261.0980, found: 261.0981

$[\alpha]_{\text{D}}^{25^\circ\text{C}} = +113$  (C=1, MeOH)

methyl (2S,3R,3aR,5R,6R,6aR)-2,6-dihydroxy-5-(hydroxymethyl)-2-isopropylhexahydrofuro[3,2-b]furan-3-carboxylate (**3g**)

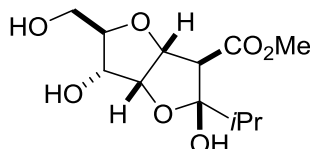

Yield: accumulated **3gi** + **3gii**: 46% (30:70)

$^1\text{H}$  NMR (500 MHz, Deuterium Oxide)  $\delta$  = 5.19 (dd,  $J$  = 4.7, 3.3 Hz, 1H), 4.72 (t,  $J$  = 4.9 Hz, 1H), 4.10 – 4.08 (m, 1H), 3.87 – 3.84 (m, 1H), 3.74 (s, 3H), 3.71 (dd,  $J$  = 12.8, 4.4 Hz, 1H), 3.65 (dd,  $J$  = 12.8, 5.3 Hz, 1H), 3.37 (d,  $J$  = 3.3 Hz, 1H), 2.22 (p,  $J$  = 6.9 Hz, 1H), 1.06 (d,  $J$  = 6.9 Hz, 3H), 1.05 (d,  $J$  = 6.9 Hz, 3H).

$^{13}\text{C}$  NMR (125 MHz, Deuterium Oxide)  $\delta$  = 171.85, 110.95, 84.14, 80.26, 80.03, 70.72, 60.09, 57.64, 52.59, 35.55, 16.71, 15.90.

HRMS-ESI: calcd. for  $\text{C}_{12}\text{H}_{19}\text{O}_7^-$  : 275.1136, found: 275.1136

methyl 2-((2R,3R,4S,5R)-3,4-dihydroxy-5-(hydroxymethyl)tetrahydrofuran-2-yl)-4-methyl-3-oxopentanoate (*keto-3g*)

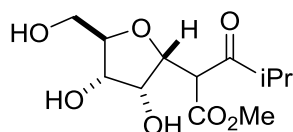

$^1\text{H}$  NMR (500 MHz, Deuterium Oxide)  $\delta$ = 4.38 (dd,  $J$  = 9.4, 5.0 Hz, 1H), 4.34 (dd,  $J$  = 8.2, 5.4 Hz, 1H), 4.26 (d,  $J$  = 8.2 Hz, 1H), 4.23 (d,  $J$  = 9.4 Hz, 1H), 4.11 (t,  $J$  = 5.2 Hz, 1H), 4.07 – 4.04 (m, 2H), 4.03 (q,  $J$  = 5.4 Hz, 1H), 3.92 – 3.85 (m, 2H), 3.76 (s, 3H), 3.74 (s, 3H), 3.70 (ddd,  $J$  = 12.4, 3.5, 1.3 Hz, 2H), 3.60 (ddd,  $J$  = 12.4, 8.6, 5.0 Hz, 2H), 2.89 (dq,  $J$  = 13.6, 6.8 Hz, 2H), 1.13 (d,  $J$  = 7.0 Hz, 3H), 1.11 (d,  $J$  = 7.0 Hz, 3H), 1.08 (d,  $J$  = 6.8 Hz, 6H).

$^{13}\text{C}$  NMR (126 MHz, Deuterium Oxide)  $\delta$ = 211.67, 210.97, 169.46, 168.66, 83.58, 83.29, 81.20, 81.00, 73.22, 73.10, 70.79, 61.41, 61.38, 59.40, 59.33, 53.18, 53.13, 42.28, 42.20, 17.08, 16.96, 16.82, 16.76.

methyl (2R,3S,3aS,5R,6R,6aS)-2,6-dihydroxy-5-(hydroxymethyl)-2-(2-methoxy-2-oxoethyl)hexahydrofuro[3,2-b]furan-3-carboxylate (*ara-4b*)

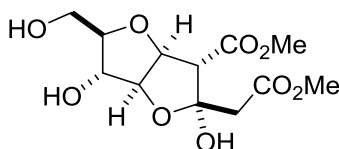

Yield: 81%

$^1\text{H}$  NMR (500 MHz, Methanol- $d_4$ )  $\delta$ = 5.22 (dd,  $J$  = 5.6, 3.7 Hz, 1H), 4.62 (dd,  $J$  = 5.6, 2.1 Hz, 1H), 4.02 (dd,  $J$  = 5.4, 2.0 Hz, 1H), 3.85 (ddd,  $J$  = 5.8, 5.44, 4.27 Hz, 1H), 3.71 (s, 3H), 3.70 (s, 3H), 3.65 (dd,  $J$  = 11.7, 4.3 Hz, 1H), 3.56 (dd,  $J$  = 11.7, 5.8 Hz, 1H), 3.55 (d,  $J$  = 4.0 Hz, 1H), 3.02 (d,  $J$  = 15.1 Hz, 1H), 2.93 (d,  $J$  = 14.6 Hz, 1H).

$^{13}\text{C}$  NMR (125 MHz, Methanol- $d_4$ )  $\delta$ = 171.73, 170.82, 107.07, 107.03, 90.32, 89.53, 85.20, 77.22, 63.04, 60.37, 52.47, 52.30, 43.63.

HRMS-ESI: calcd. for  $\text{C}_{11}\text{H}_{17}\text{O}_9$  : 305.0878, found: 305.0878

$[\alpha]_{\text{D}}^{25^\circ\text{C}}$  = -36 (C=1, MeOH)



methyl (2S,3R,3aR,5R,6S,6aR)-2,6-dihydroxy-5-(hydroxymethyl)-2-(2-methoxy-2-oxoethyl)hexahydrofuro[3,2-b]furan-3-carboxylate (xylo-**5b**)

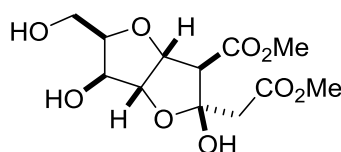

Yield: 83%

$^1\text{H}$  NMR (500 MHz, Methanol- $d_4$ )  $\delta$ = 5.40 (dd,  $J$  = 5.6, 4.1 Hz, 1H), 4.54 (d,  $J$  = 5.5 Hz, 1H), 4.06 (d,  $J$  = 2.9 Hz, 1H), 3.92 (ddd,  $J$  = 6.4, 4.9, 2.9 Hz, 1H), 3.81 (dd,  $J$  = 11.5, 5.0 Hz, 1H), 3.74 (dd,  $J$  = 11.5, 6.3 Hz, 1H), 3.73 (s, 3H), 3.69 (s, 3H), 3.59 (d,  $J$  = 4.4 Hz, 1H), 3.06 (d,  $J$  = 15.3 Hz, 1H), 2.90 (d,  $J$  = 15.2 Hz, 1H).

$^{13}\text{C}$  NMR (125 MHz, Methanol- $d_4$ )  $\delta$ = 171.64, 170.99, 88.16, 84.60, 81.99, 75.96, 60.85, 58.85, 52.57, 52.27, 42.56.

HRMS-ESI: calcd. for  $\text{C}_{23}\text{H}_{18}\text{O}_9\text{Cl}^-$  : 341.0645, found: 341.0645

$[\alpha]_{\text{D}}^{25^\circ\text{C}} = +49$  (C=1, MeOH)

methyl (2S,3R,3aR,5S,6S,6aR)-5-((R)-1,2-dihydroxyethyl)-2,6-dihydroxy-2-(2-methoxy-2-oxoethyl)hexahydrofuro[3,2-b]furan-3-carboxylate (gluco-**6b**)

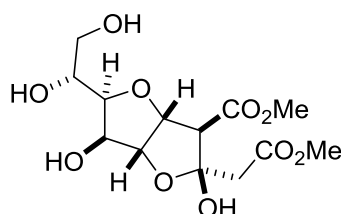

Yield: 27%

$^1\text{H}$  NMR (500 MHz, Methanol- $d_4$ )  $\delta$ = 5.38 (dd,  $J$  = 5.3, 4.2 Hz, 1H), 4.54 (d,  $J$  = 5.3 Hz, 1H), 4.15 (d,  $J$  = 2.7 Hz, 1H), 3.89 (ddd,  $J$  = 8.8, 6.0, 3.1 Hz, 1H), 3.75 (dd,  $J$  = 4.4, 2.9 Hz, 1H), 3.74 (dd,  $J$  = 11.4, 8.8 Hz, 1H), 3.72 (s, 3H), 3.69 (s, 3H), 3.58 (dd,  $J$  = 11.4, 6.1 Hz, 1H), 3.05 (d,  $J$  = 15.2 Hz, 1H), 2.90 (d,  $J$  = 15.0 Hz, 1H).

$^{13}\text{C}$  NMR (125 MHz, Methanol- $d_4$ )  $\delta$ = 171.66, 171.02, 105.75, 105.72, 87.85, 84.78, 81.03, 75.60, 70.38, 65.37, 59.10, 52.53, 52.30, 42.72.

HRMS-ESI: calcd. for  $\text{C}_{13}\text{H}_{20}\text{O}_{10}\text{Cl}^-$  : 371.0750, found: 371.0751

$[\alpha]_{\text{D}}^{25^\circ\text{C}} = +59$  (C=1, MeOH)

methyl (2S,3R,3aR,5R,6S,6aR)-5-((R)-1,2-dihydroxyethyl)-2,6-dihydroxy-2-(2-methoxy-2-oxoethyl)hexahydrofuro[3,2-b]furan-3-carboxylate (galacto-**7b**)

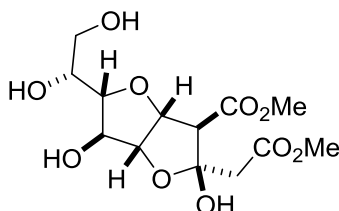

Yield: 67%

$^1\text{H}$  NMR (500 MHz, Methanol- $d_4$ )  $\delta$  = 5.18 (dd,  $J$  = 5.8, 3.9 Hz, 1H), 4.63 (dd,  $J$  = 5.8, 2.5 Hz, 1H), 4.15 (dd,  $J$  = 6.8, 2.5 Hz, 1H), 3.78 (dd,  $J$  = 6.8, 4.0 Hz, 1H), 3.71 (s, 3H), 3.70 (s, 3H), 3.64 (dd,  $J$  = 10.8, 7.2 Hz, 1H), 3.63 – 3.55 (m, 2H), 3.61 (d,  $J$  = 3.8 Hz, 1H) 3.04 (d,  $J$  = 15.1 Hz, 1H), 2.95 (d,  $J$  = 14.8 Hz, 1H).

$^{13}\text{C}$  NMR (125 MHz, Methanol- $d_4$ )  $\delta$  = 171.98, 170.83, 107.28, 90.54, 88.23, 84.80, 77.35, 72.23, 64.65, 59.90, 52.47, 52.34, 43.54.

HRMS-ESI: calcd. for  $\text{C}_{13}\text{H}_{19}\text{O}_{10}^-$  : 335.0984, found: 371.0982

$[\alpha]_{\text{D}}^{25^\circ\text{C}} = +24$  (C=1, MeOH)

## Literature

[1] J. A. Secrist, C. J. Hickey, R. E. Norris, *J. Org. Chem.* **1977**, *42*, 525-527.

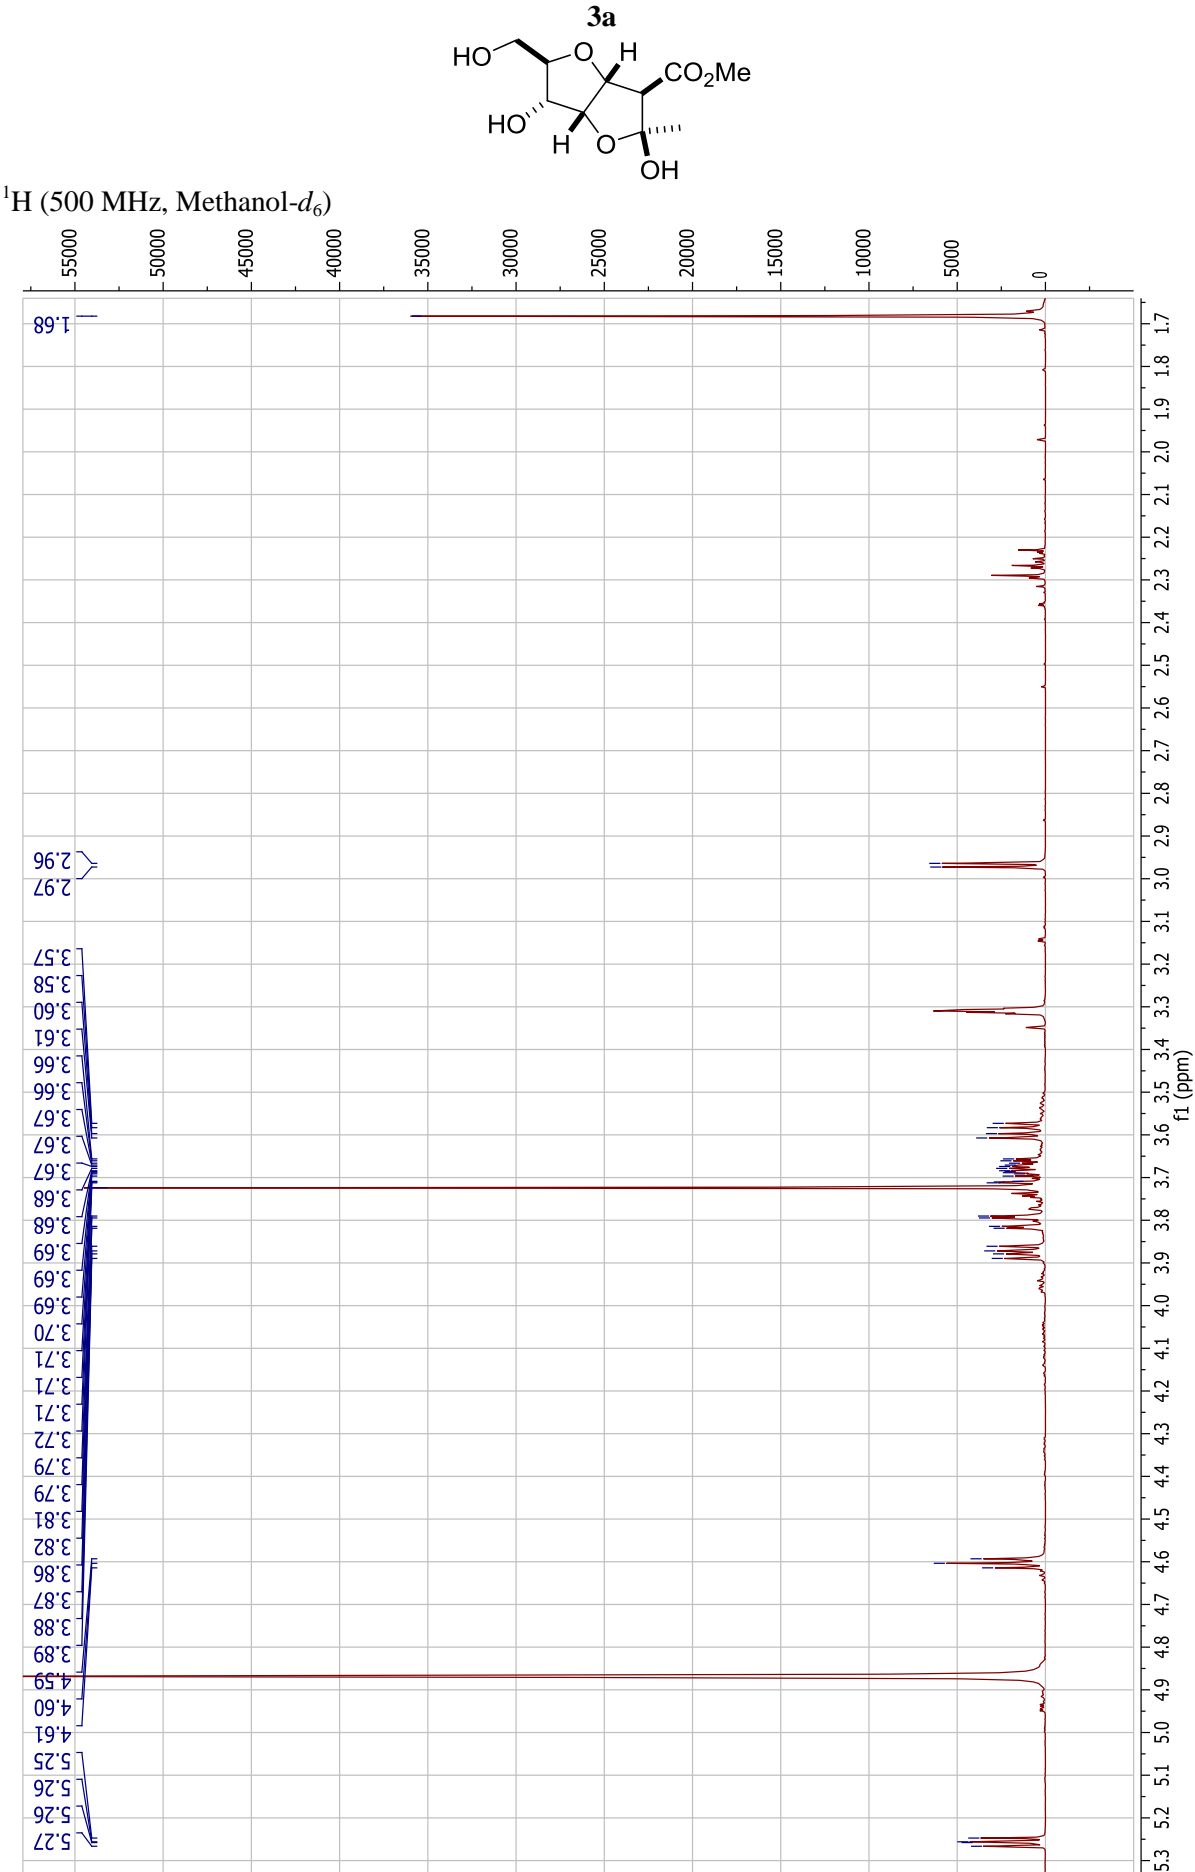

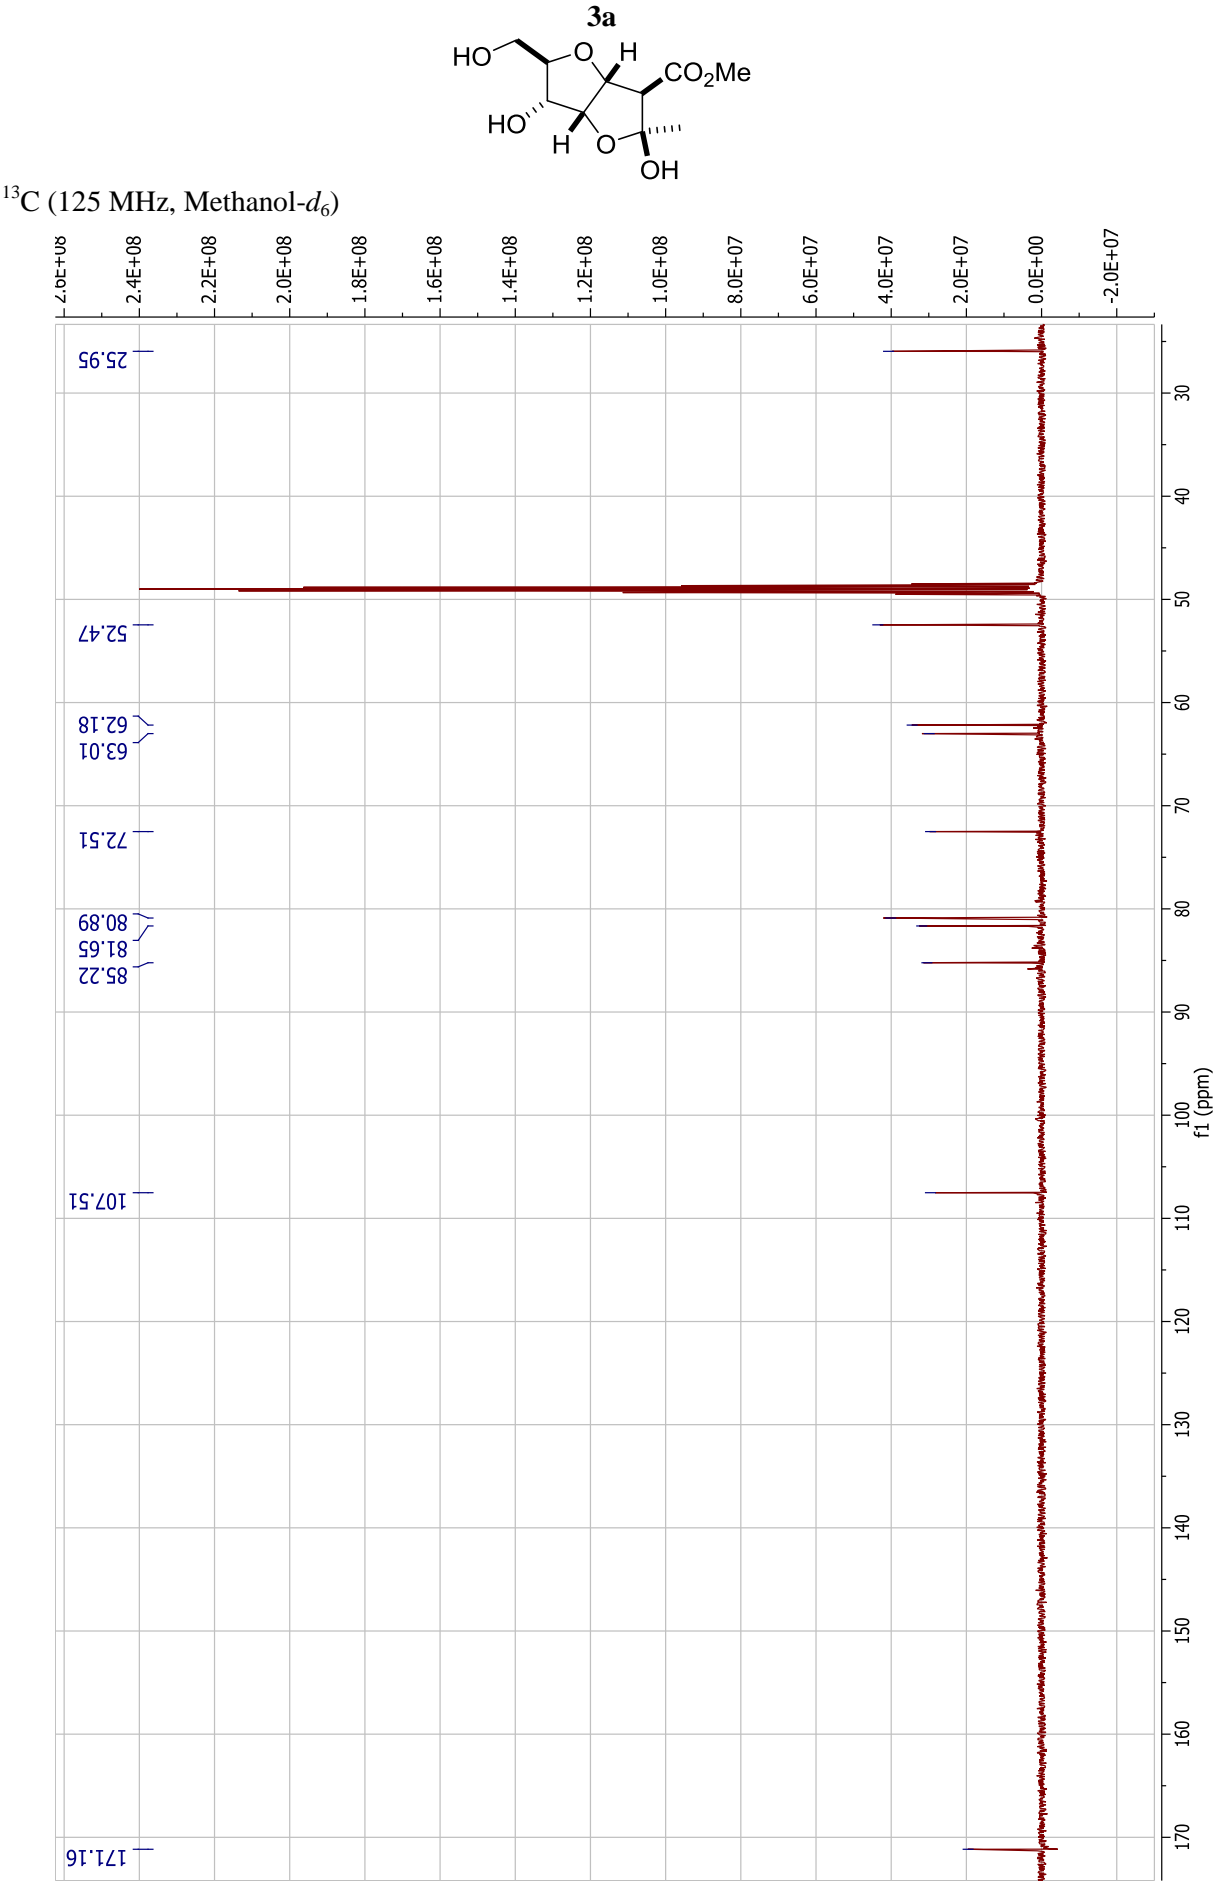

**3b**

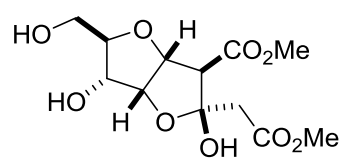

<sup>1</sup>H (500 MHz, Methanol-*d*<sub>6</sub>)

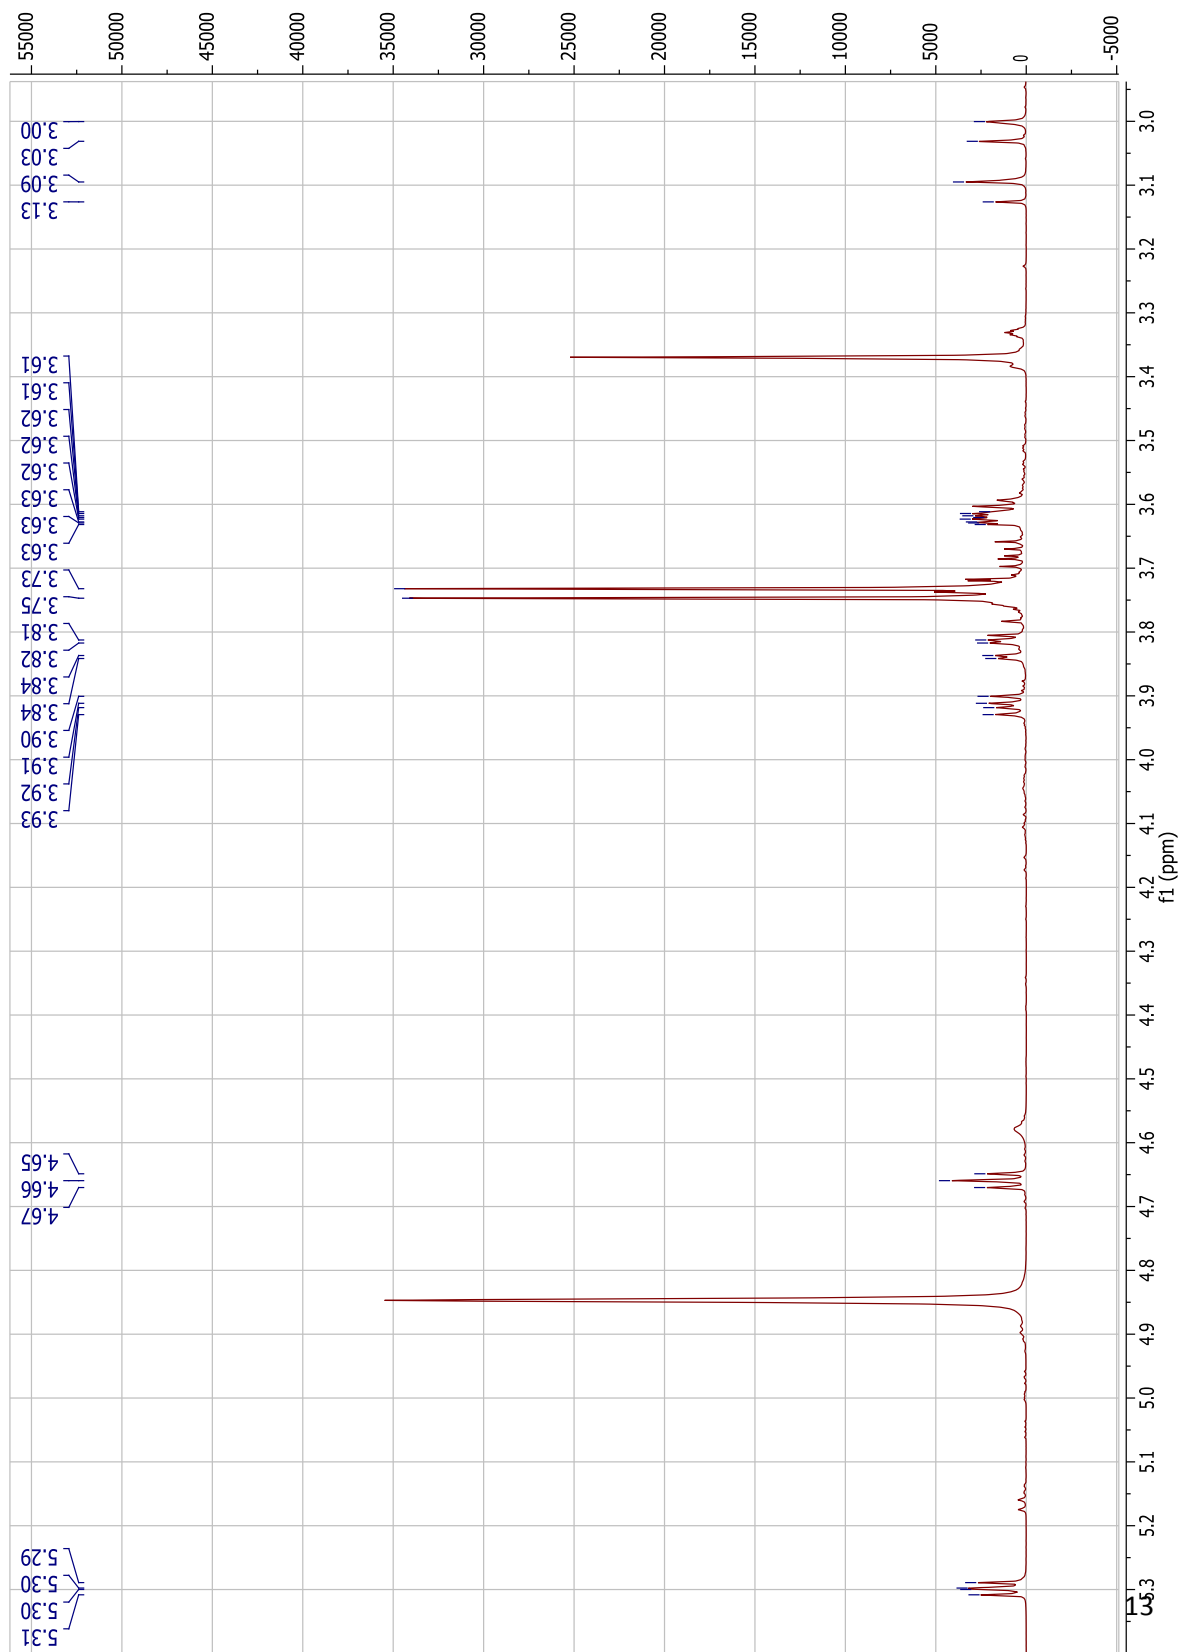

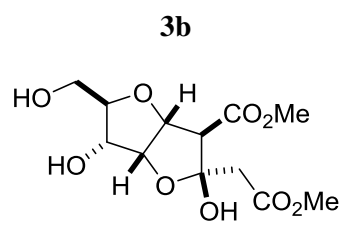

<sup>13</sup>C (125 MHz, Methonol-*d*<sub>6</sub>)

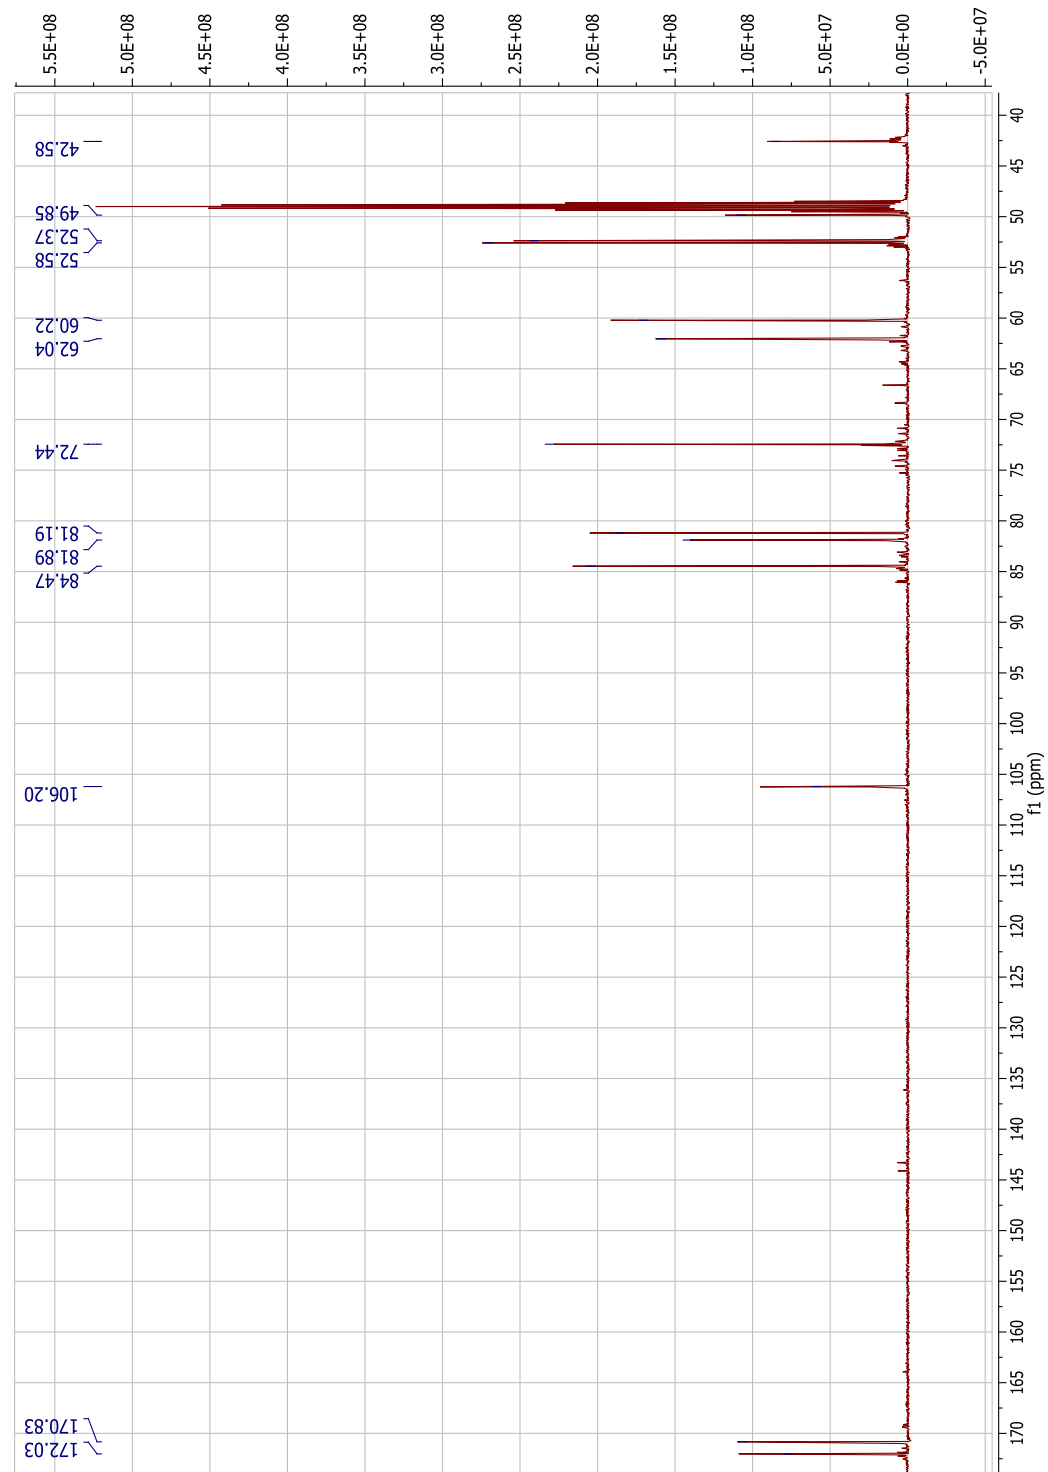

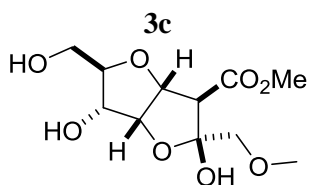

<sup>1</sup>H (500 MHz, Methanol-*d*<sub>6</sub>)

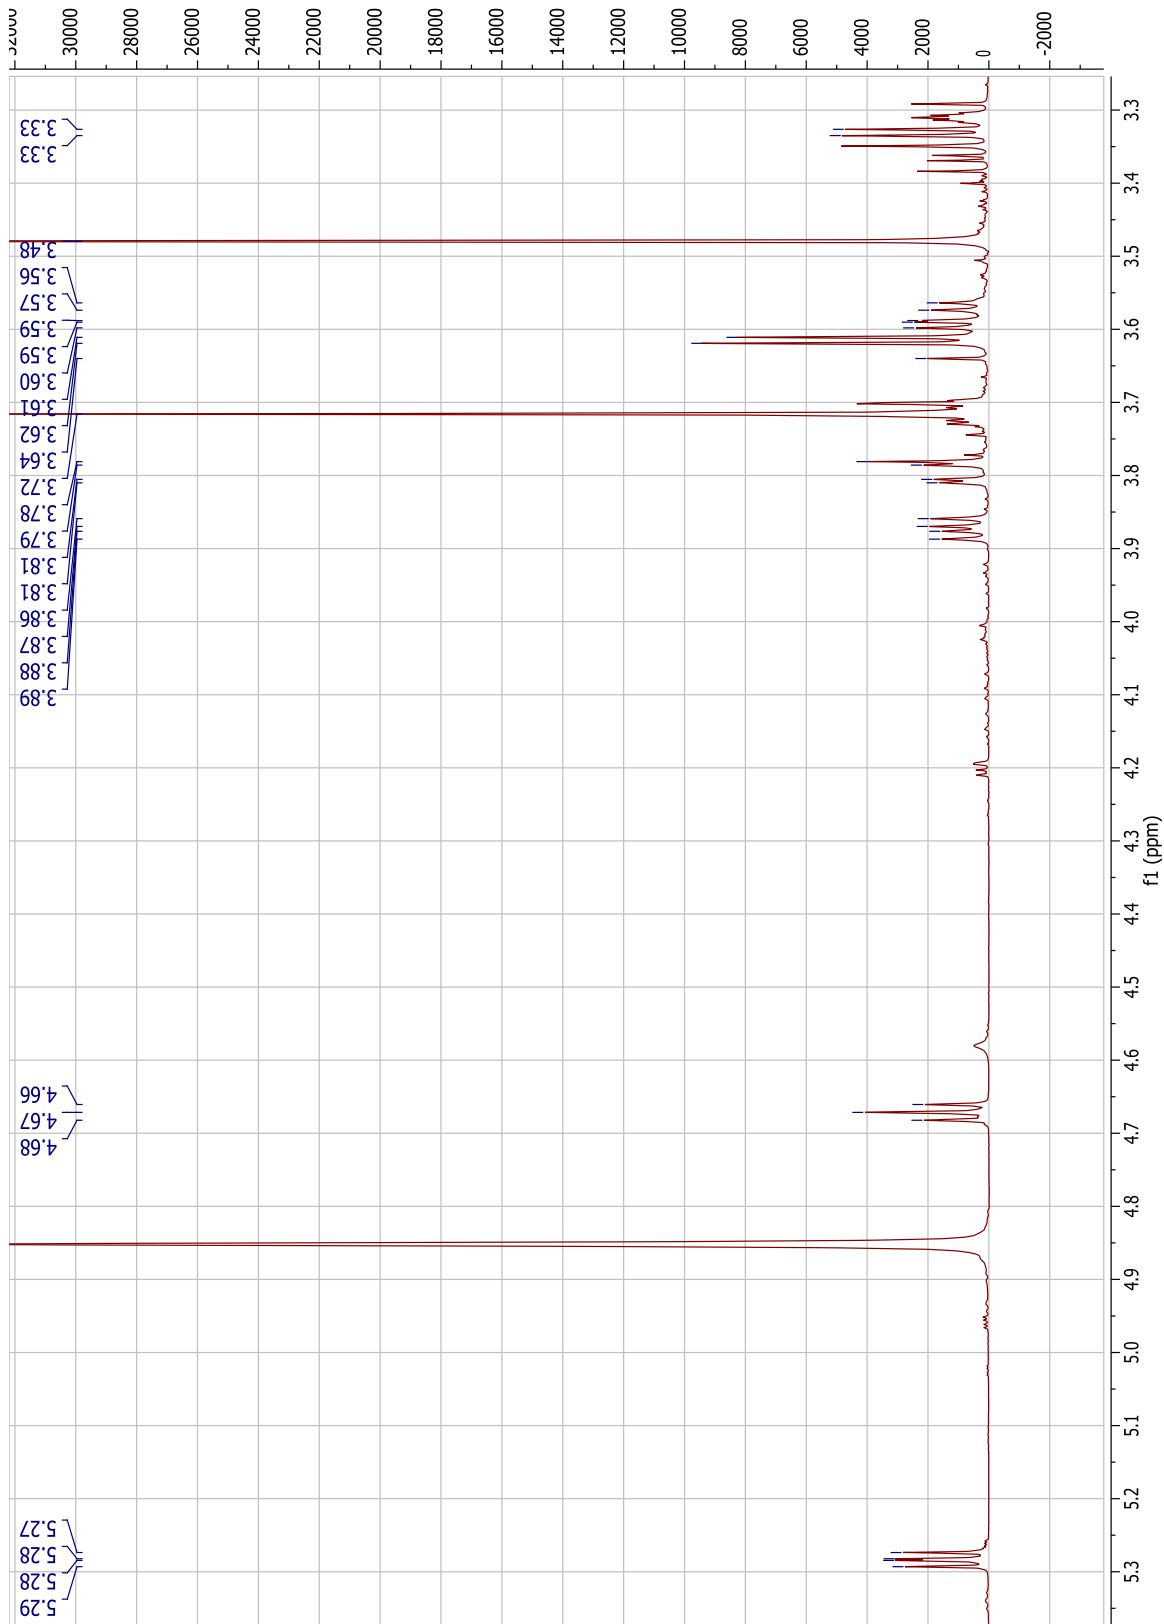

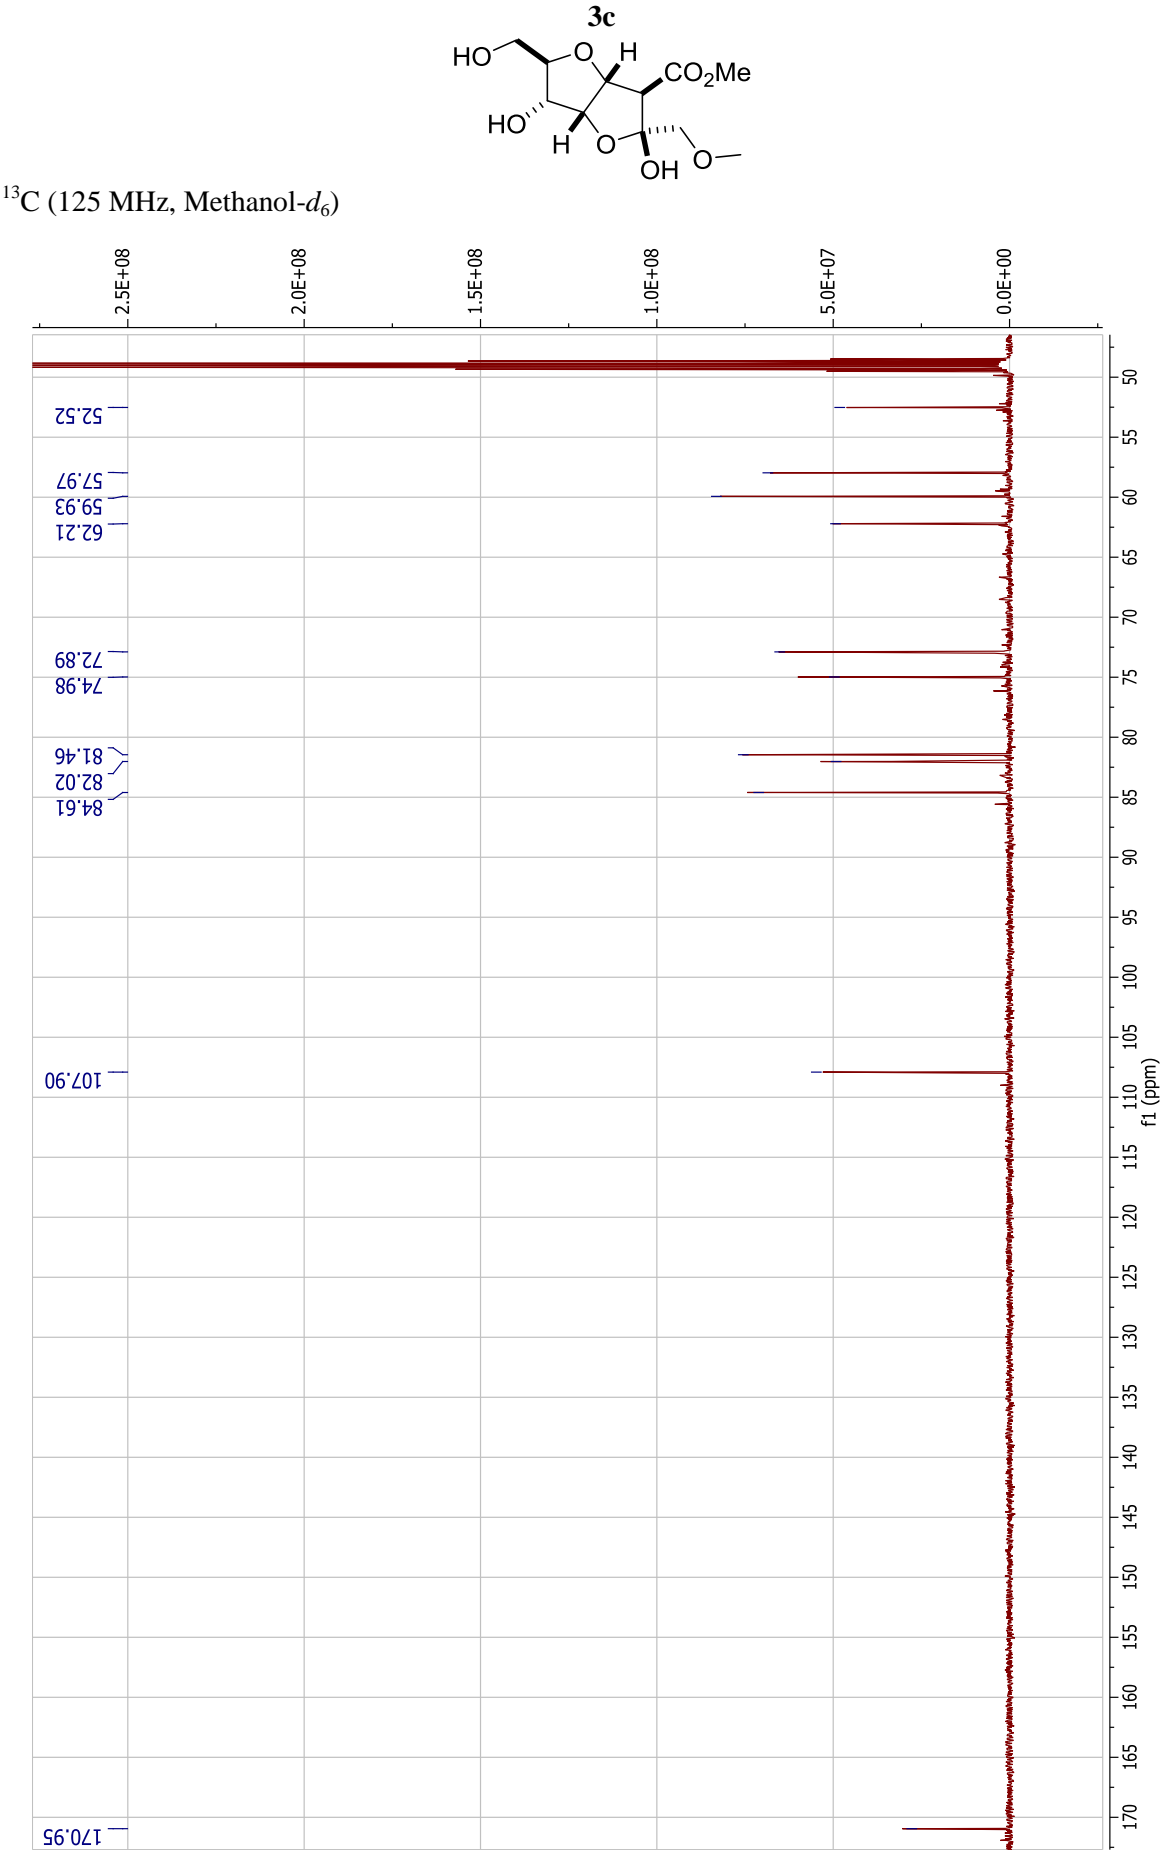



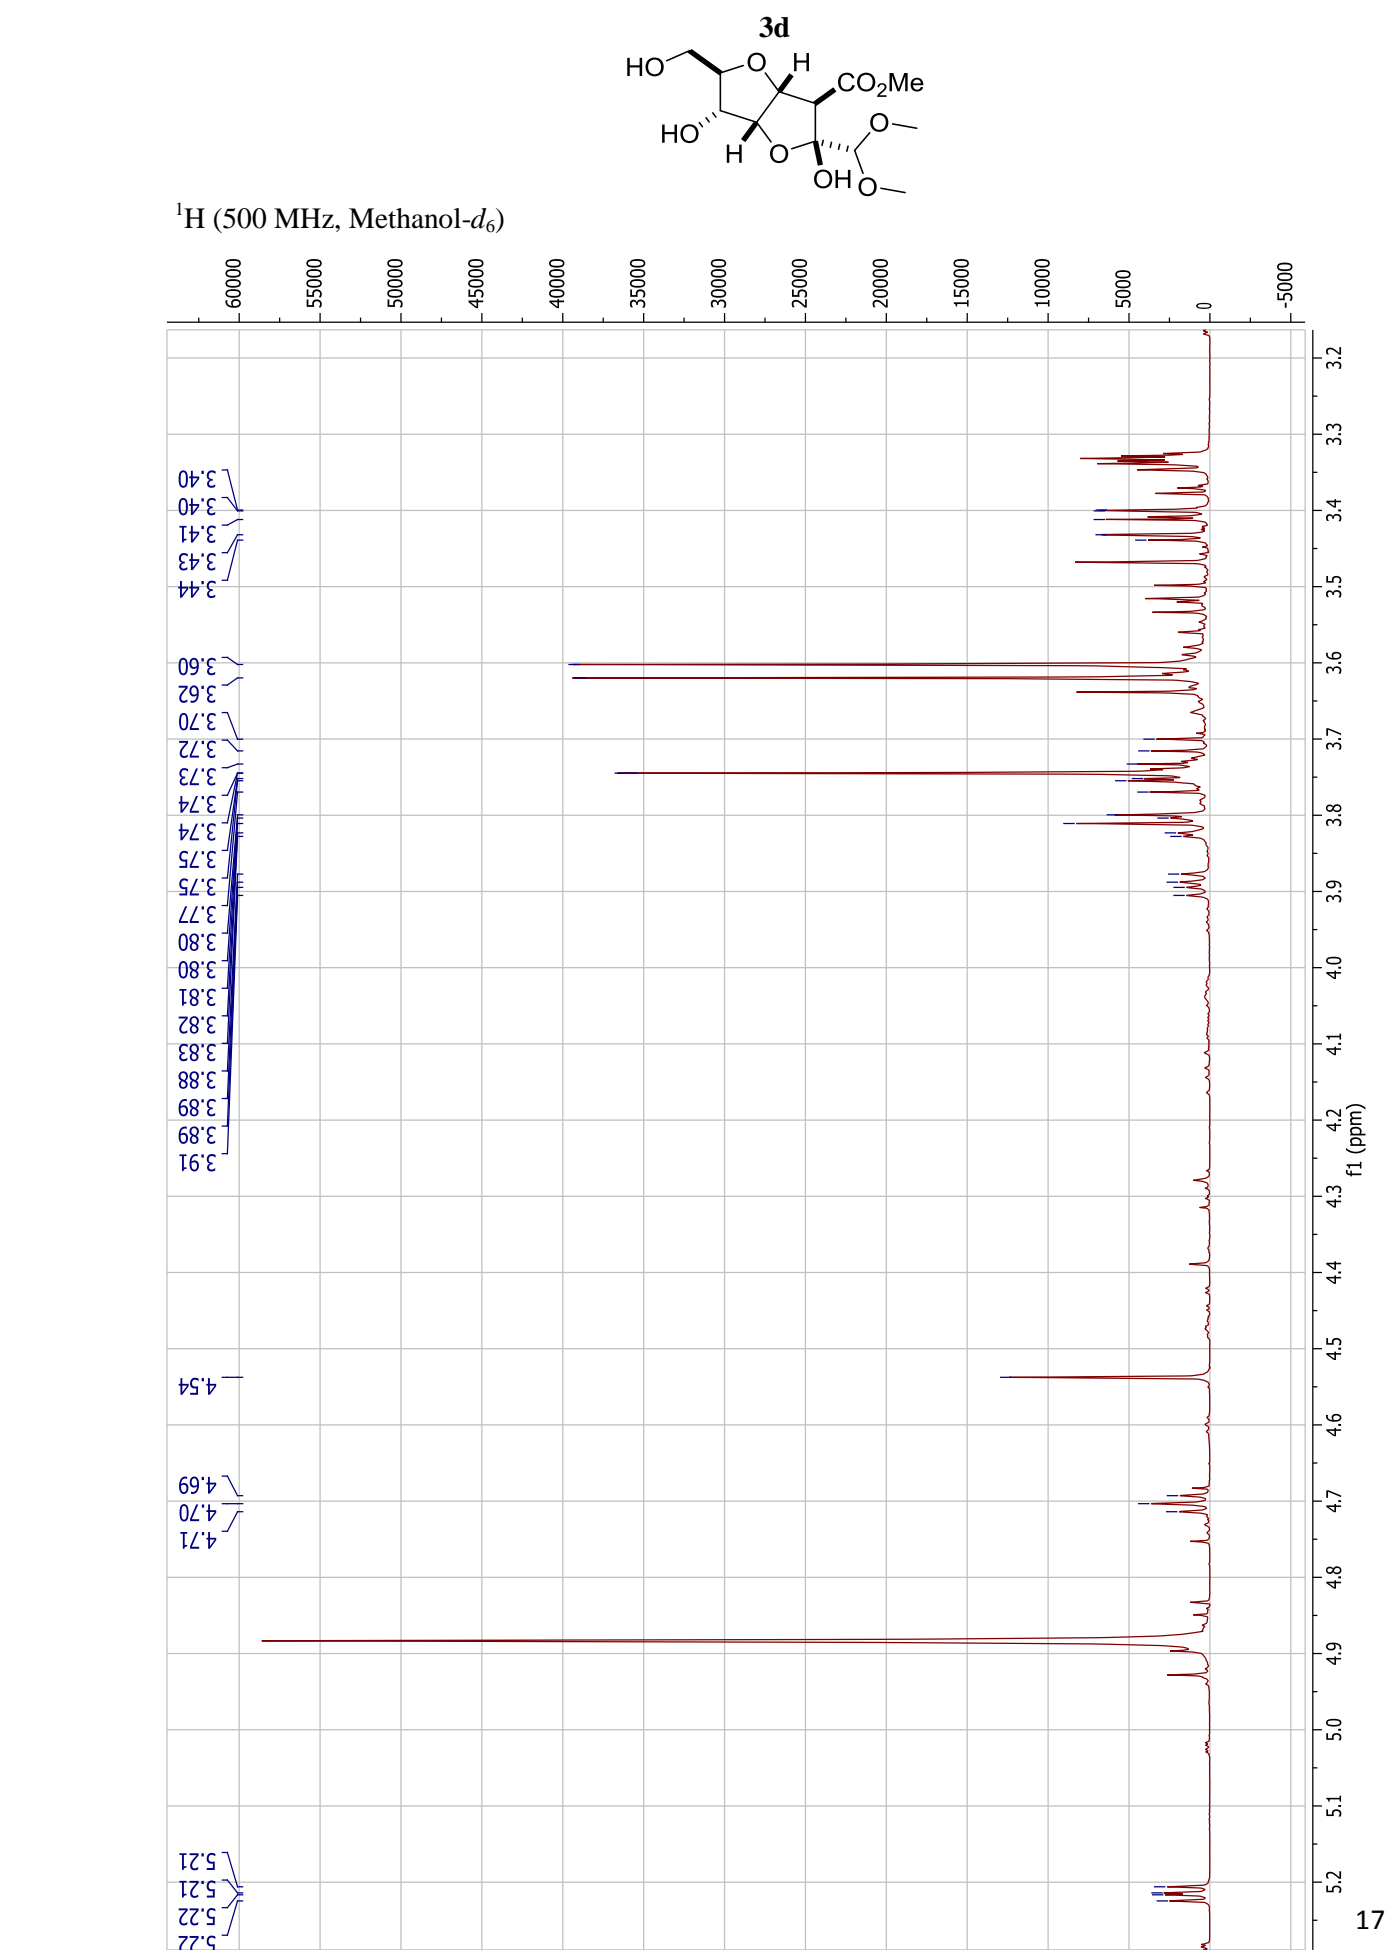

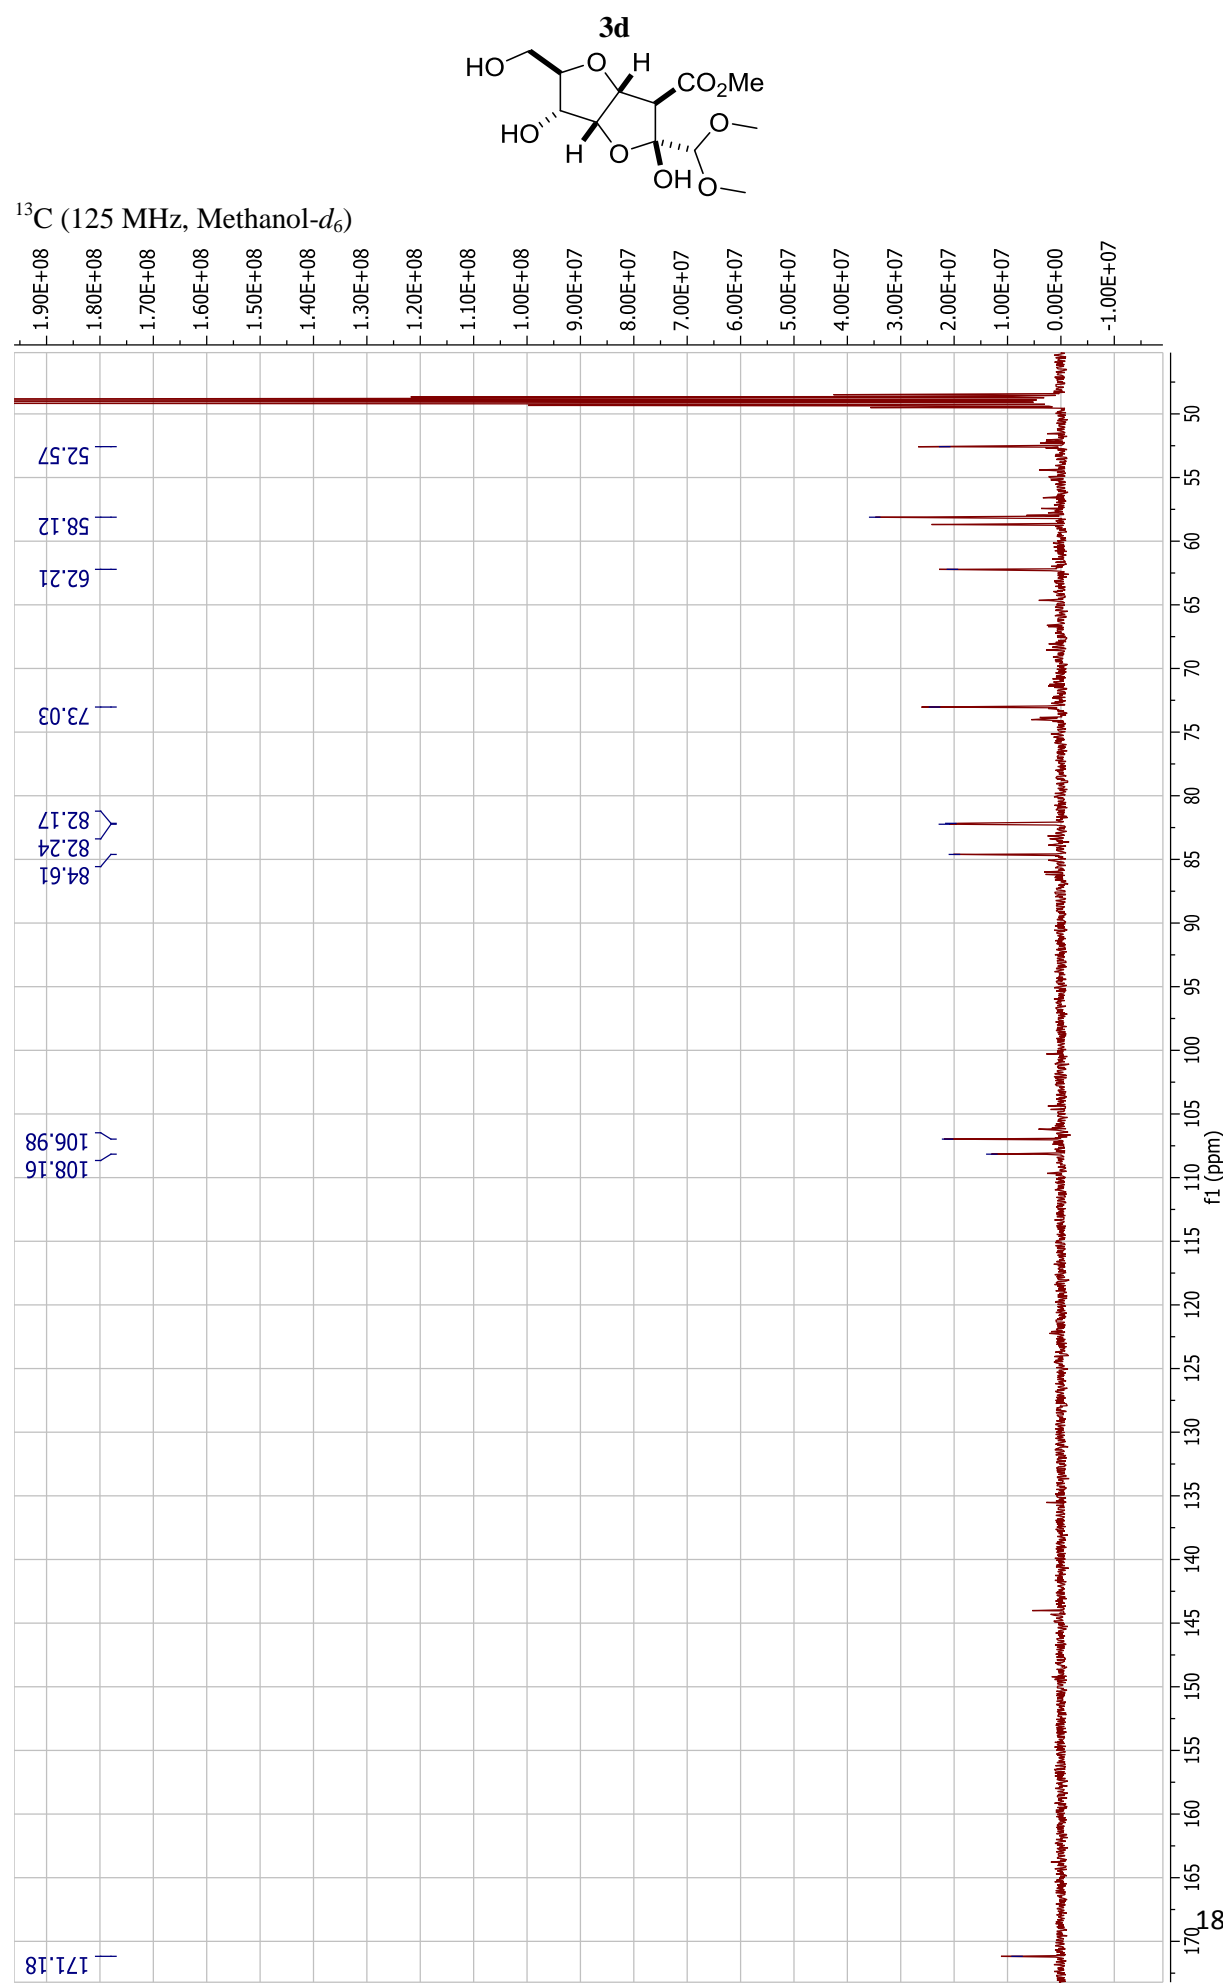

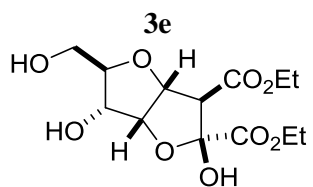

Contains 5% diethyl oxosuccinic ester **2e** as impurity

$^1\text{H}$  (500 MHz, Methanol- $d_6$ )

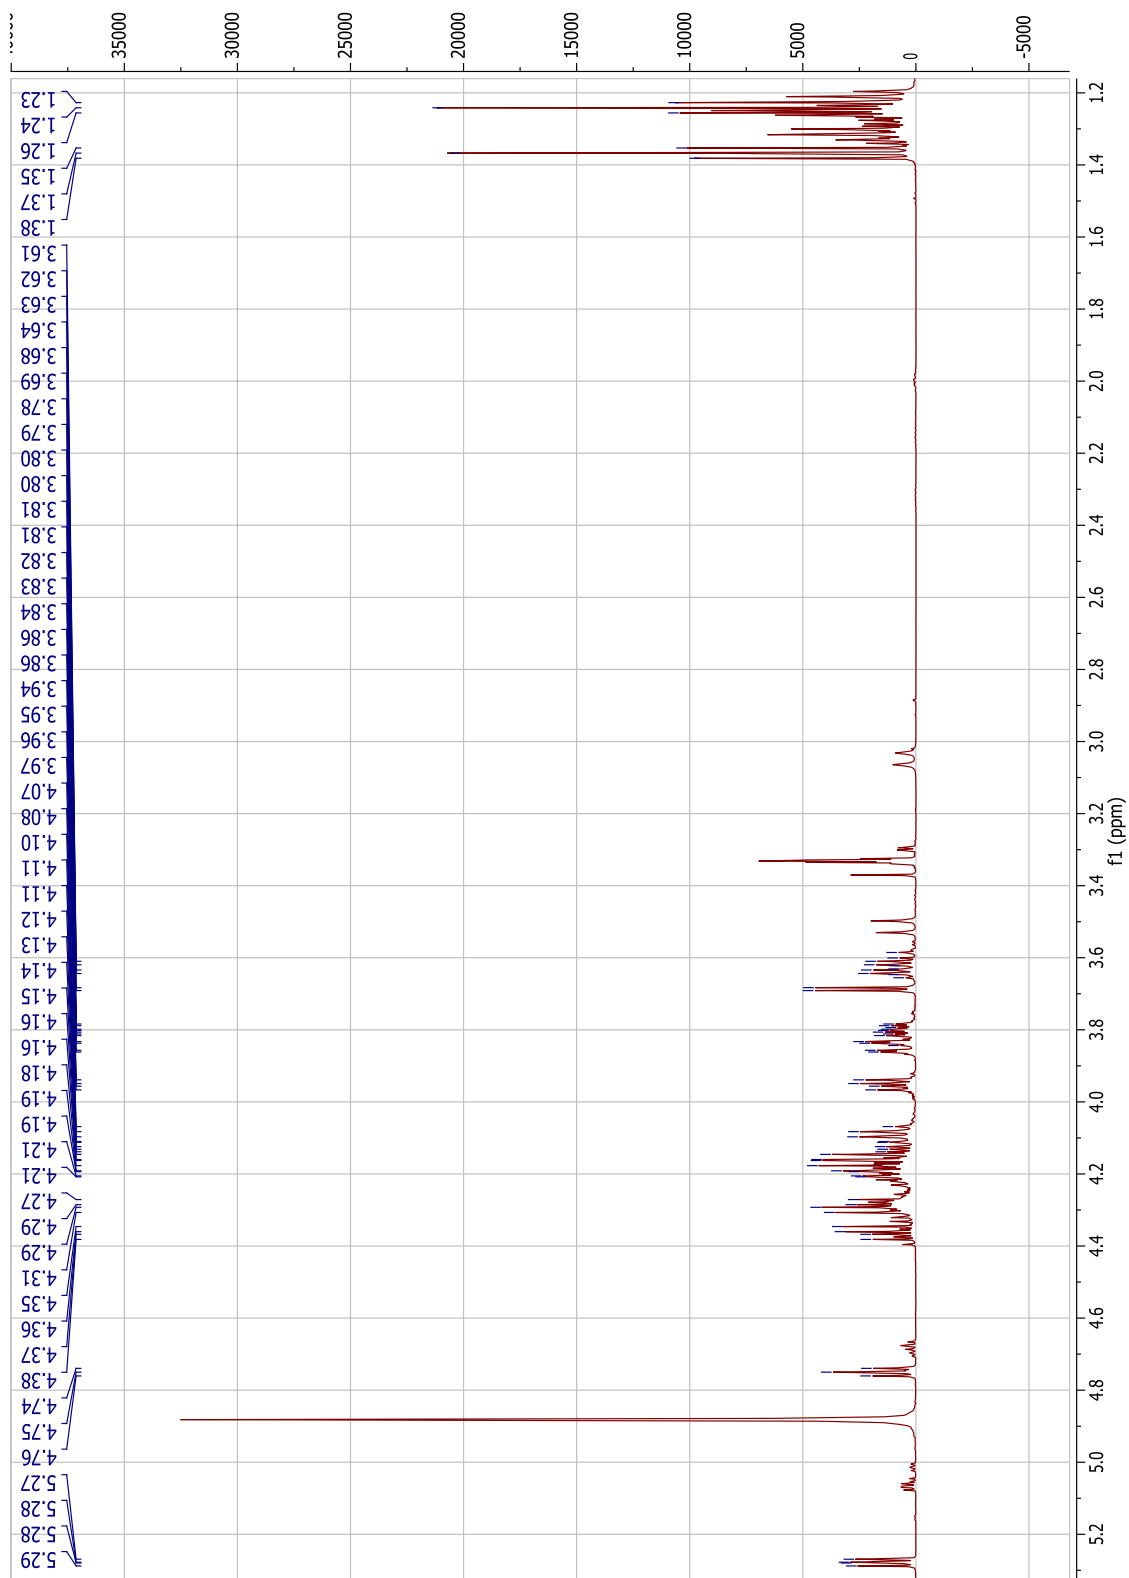

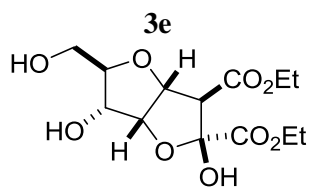

Contains 5% diethyl oxosuccinic ester **2e** as impurity

<sup>13</sup>C (125 MHz, Methanol-*d*<sub>6</sub>)

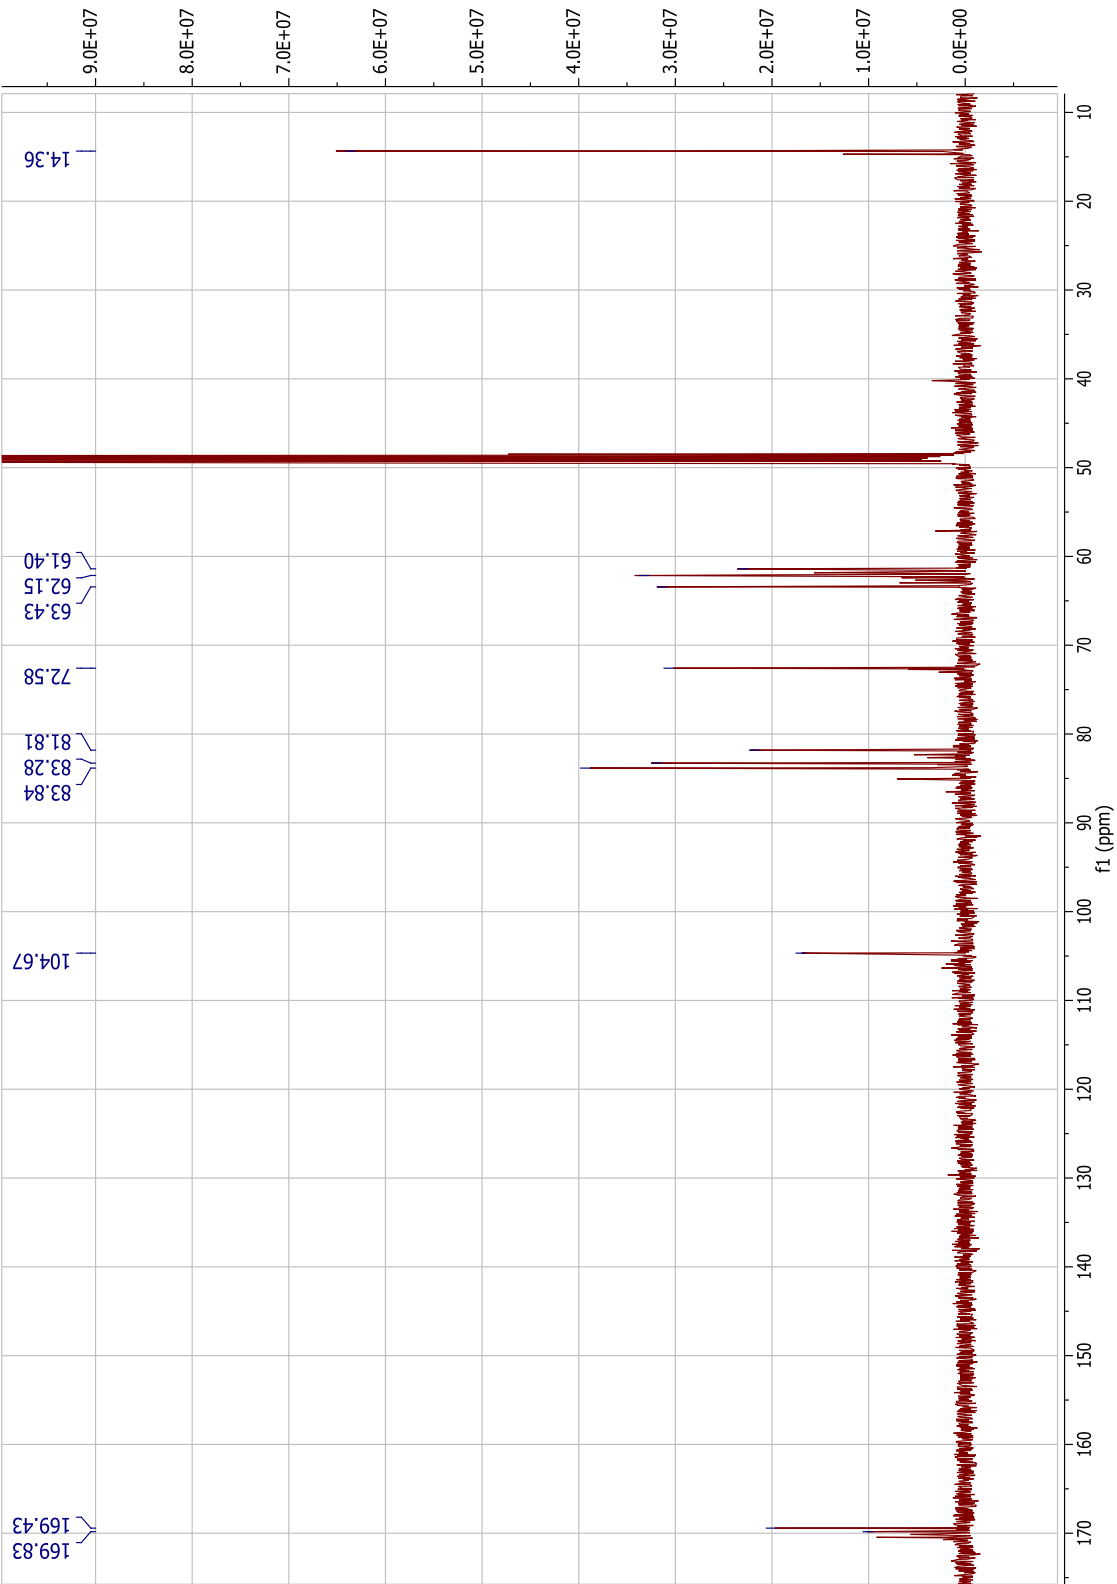

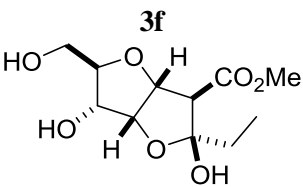

<sup>1</sup>H (500 MHz, Methanol-*d*<sub>6</sub>)

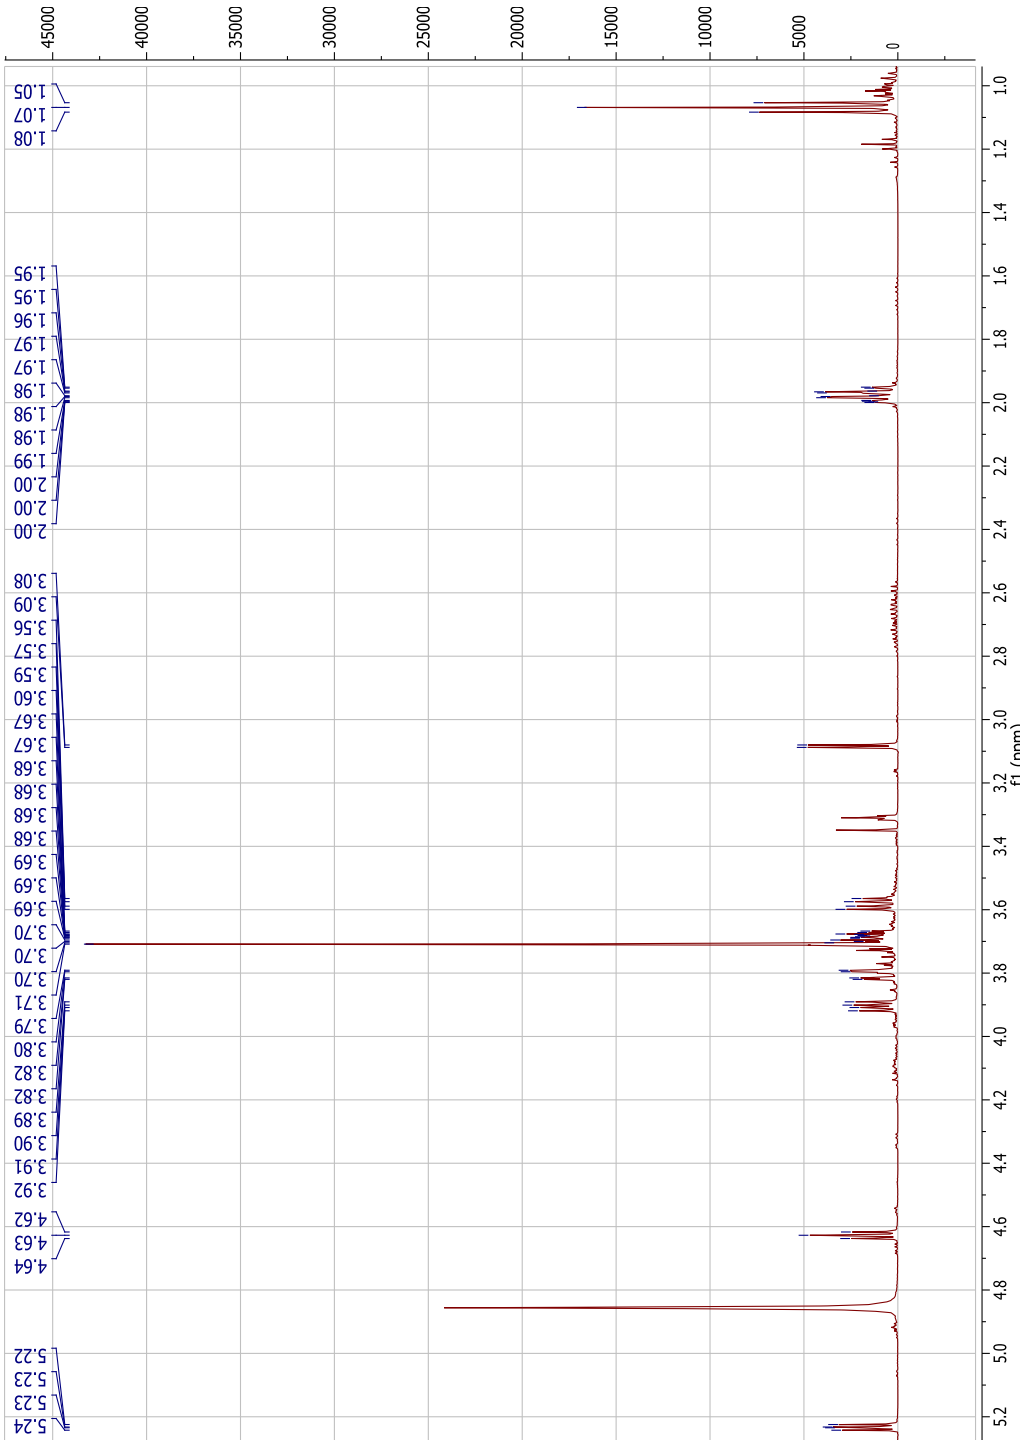

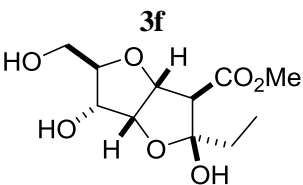

<sup>13</sup>C (125 MHz, Methanol-*d*<sub>6</sub>)

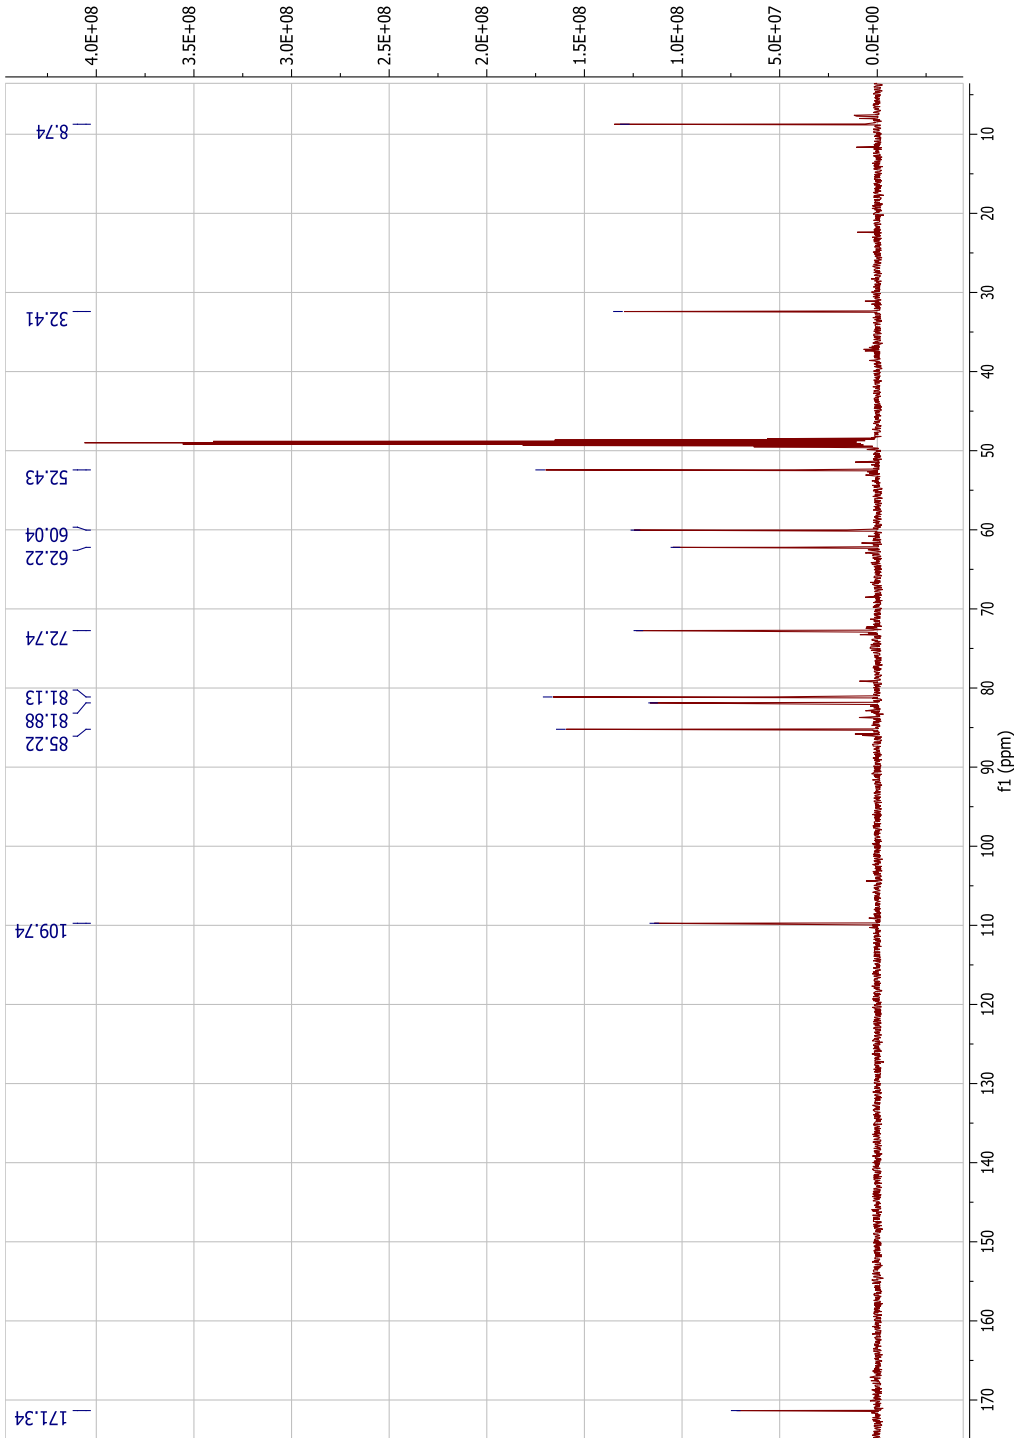

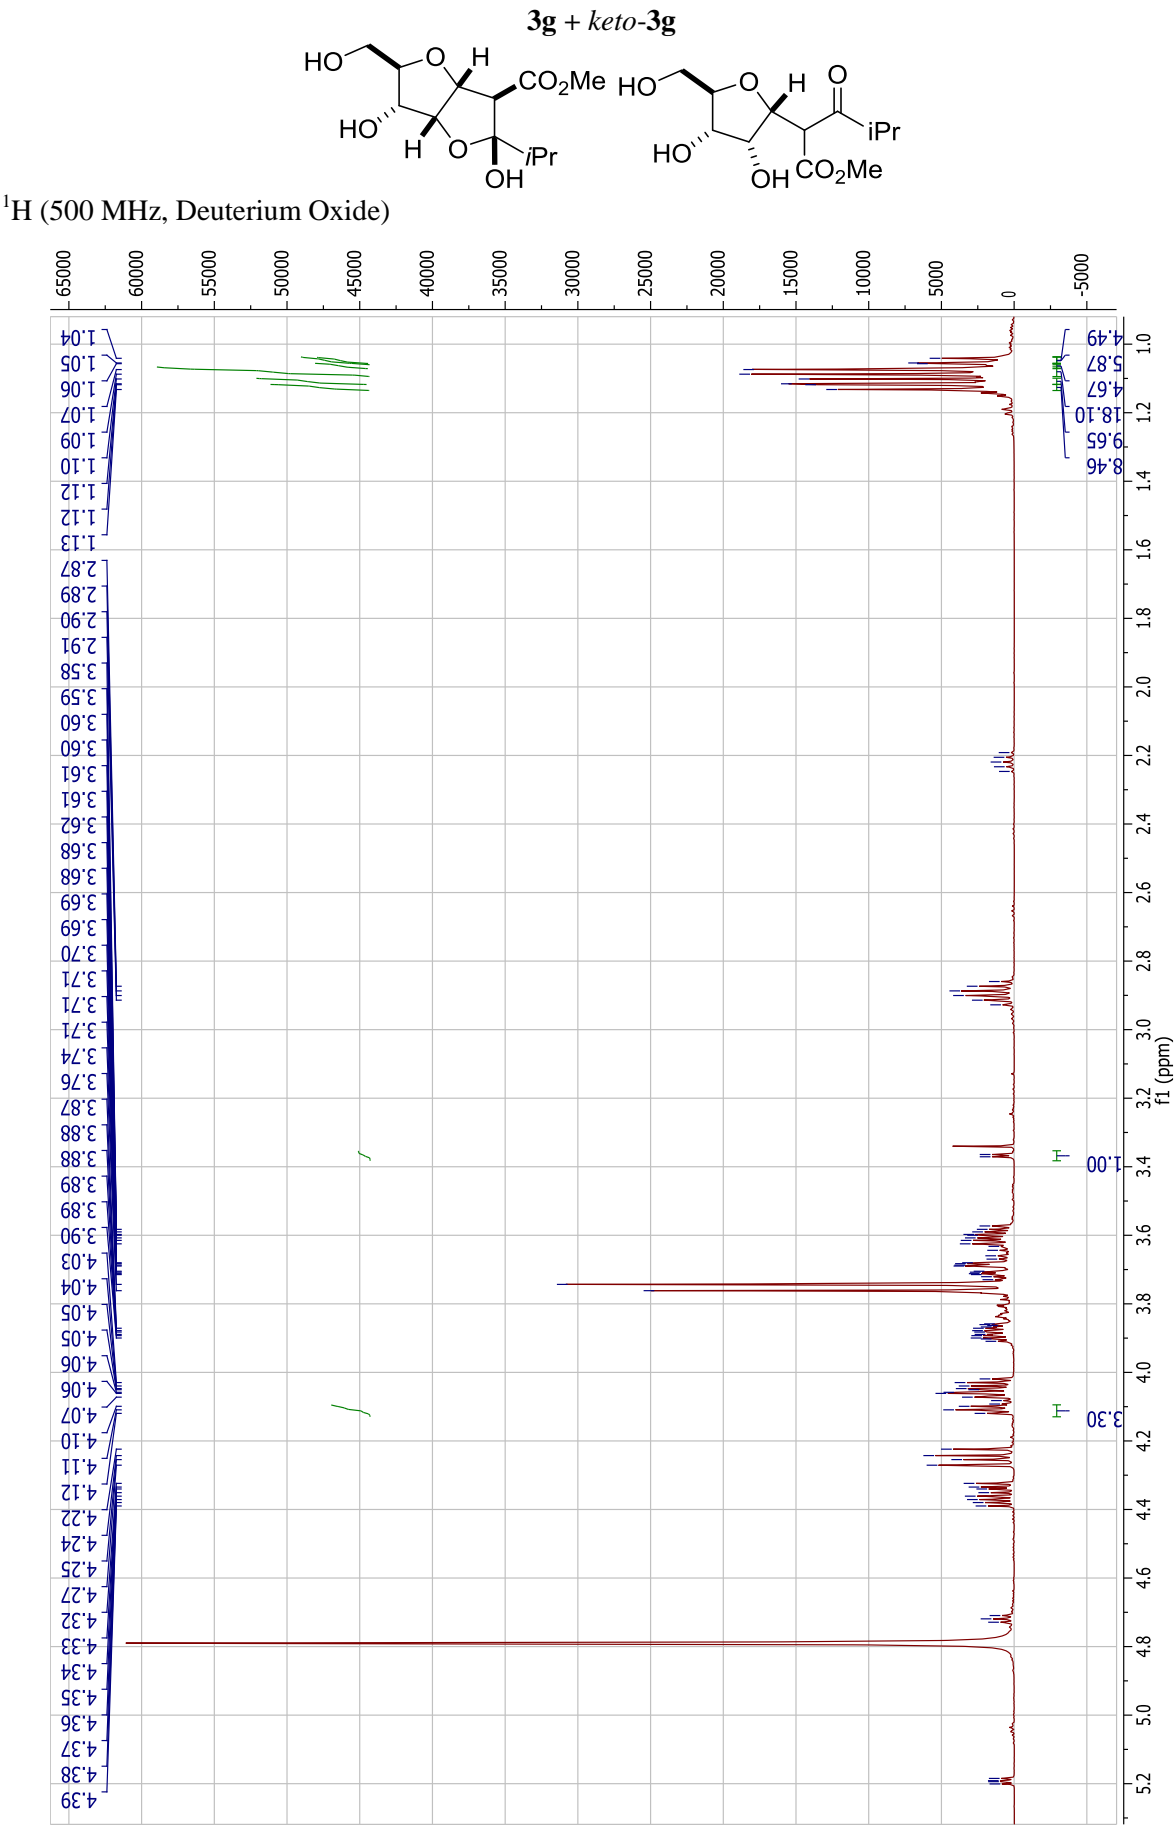

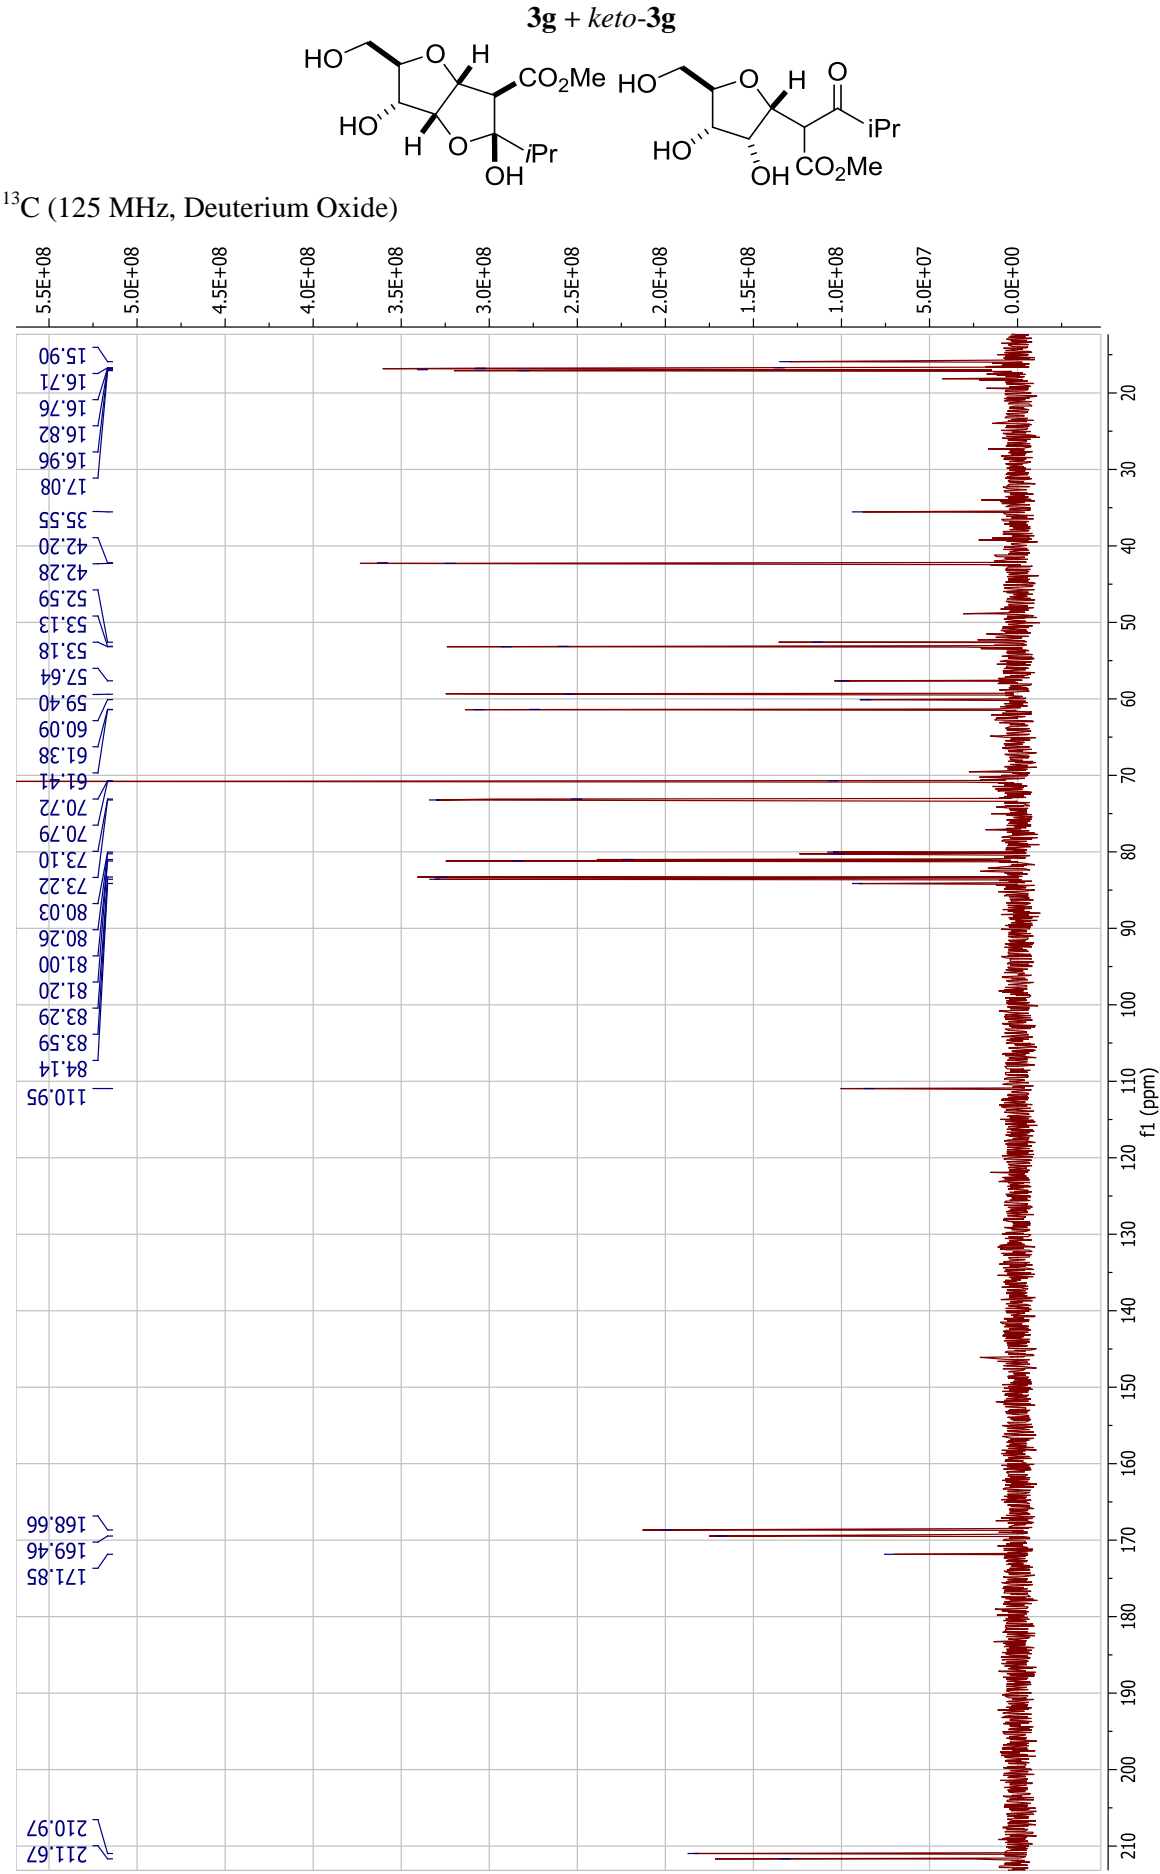



ara-4b

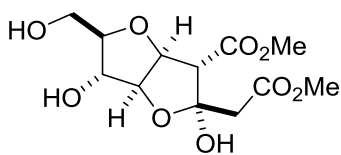

<sup>1</sup>H (500 MHz, Methanol-*d*<sub>6</sub>)

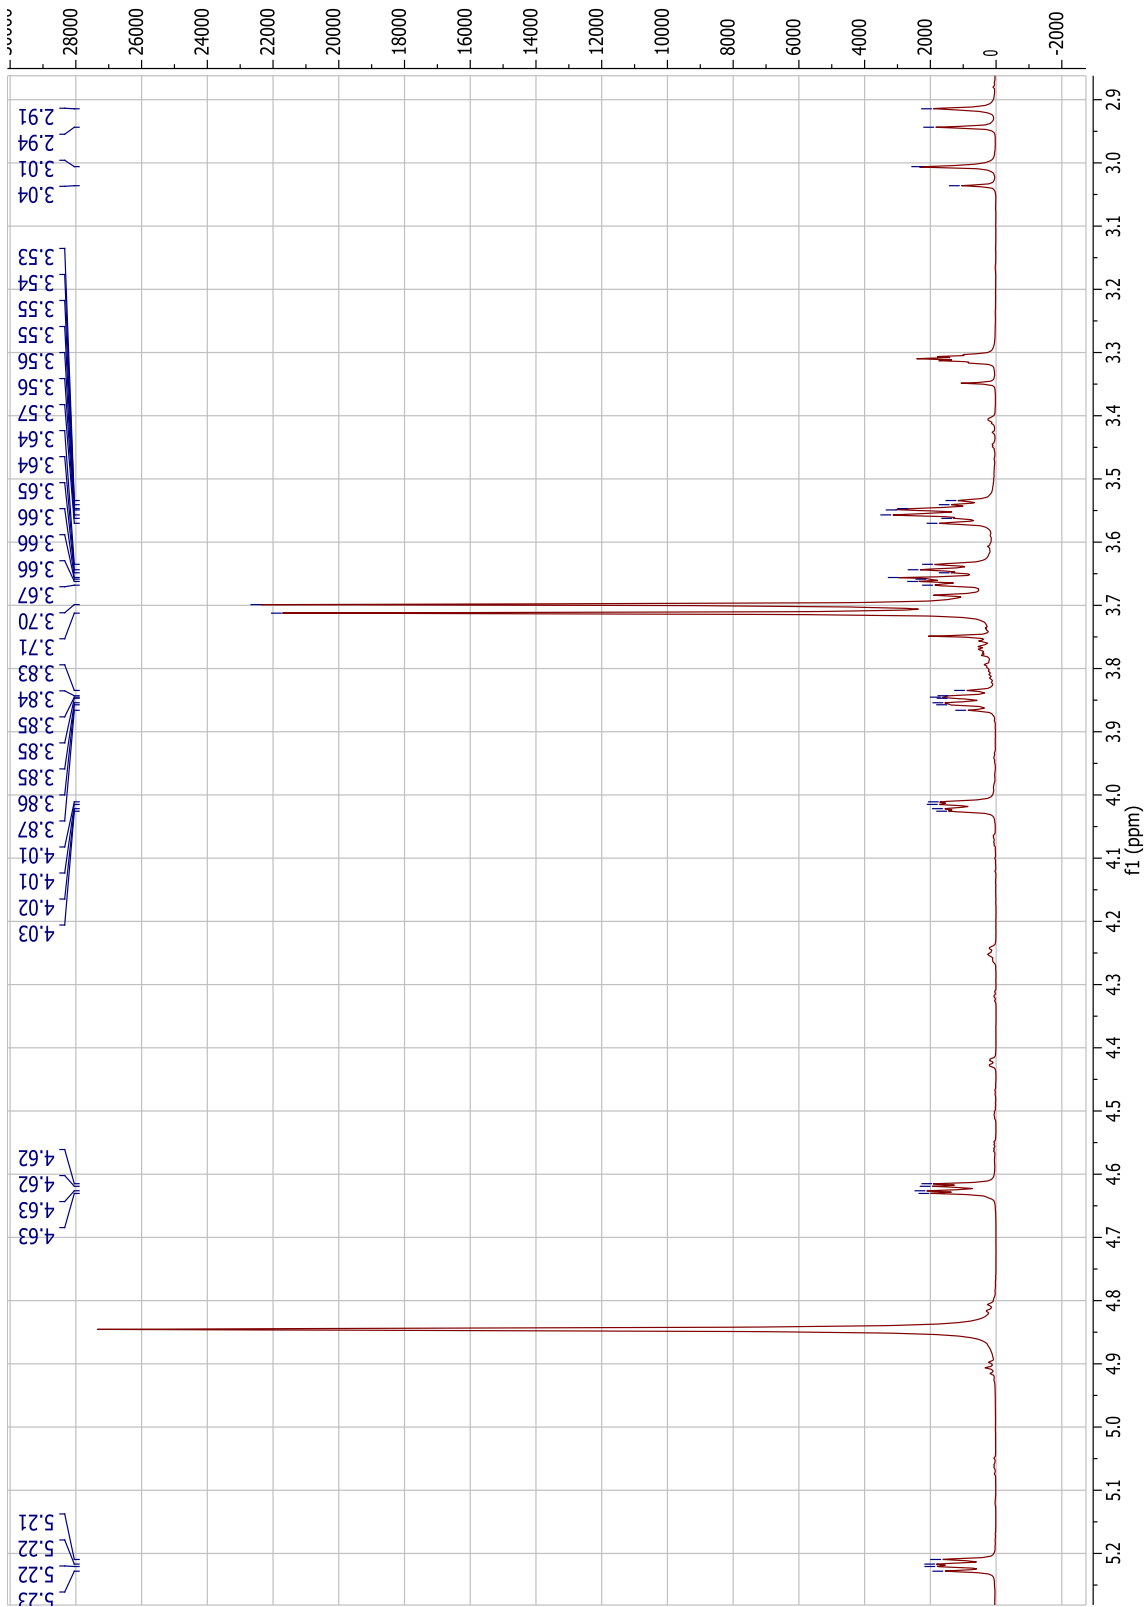

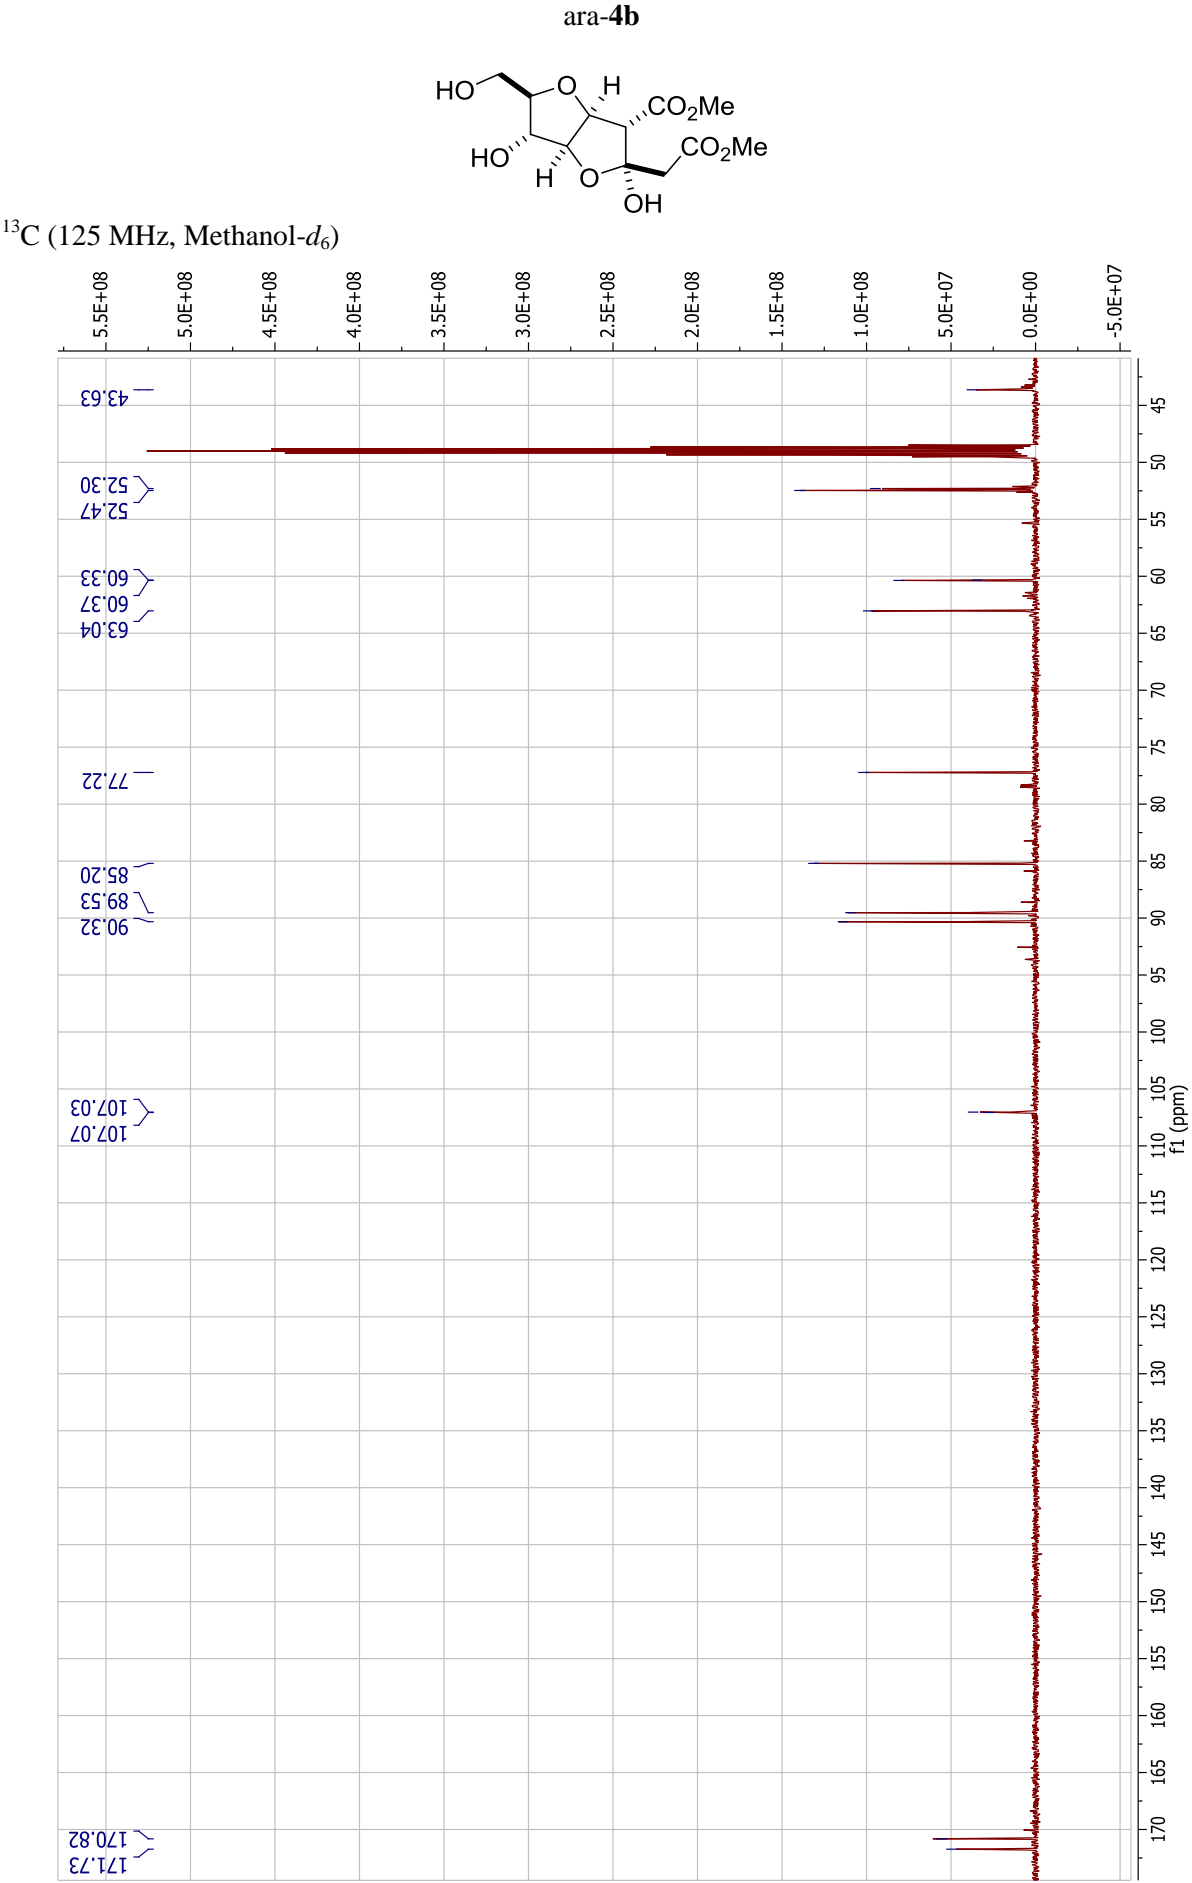

xylo-**5b**

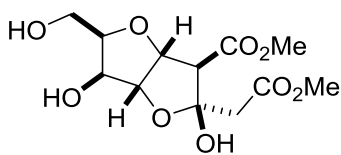

<sup>1</sup>H (500 MHz, Methanol-*d*<sub>6</sub>)

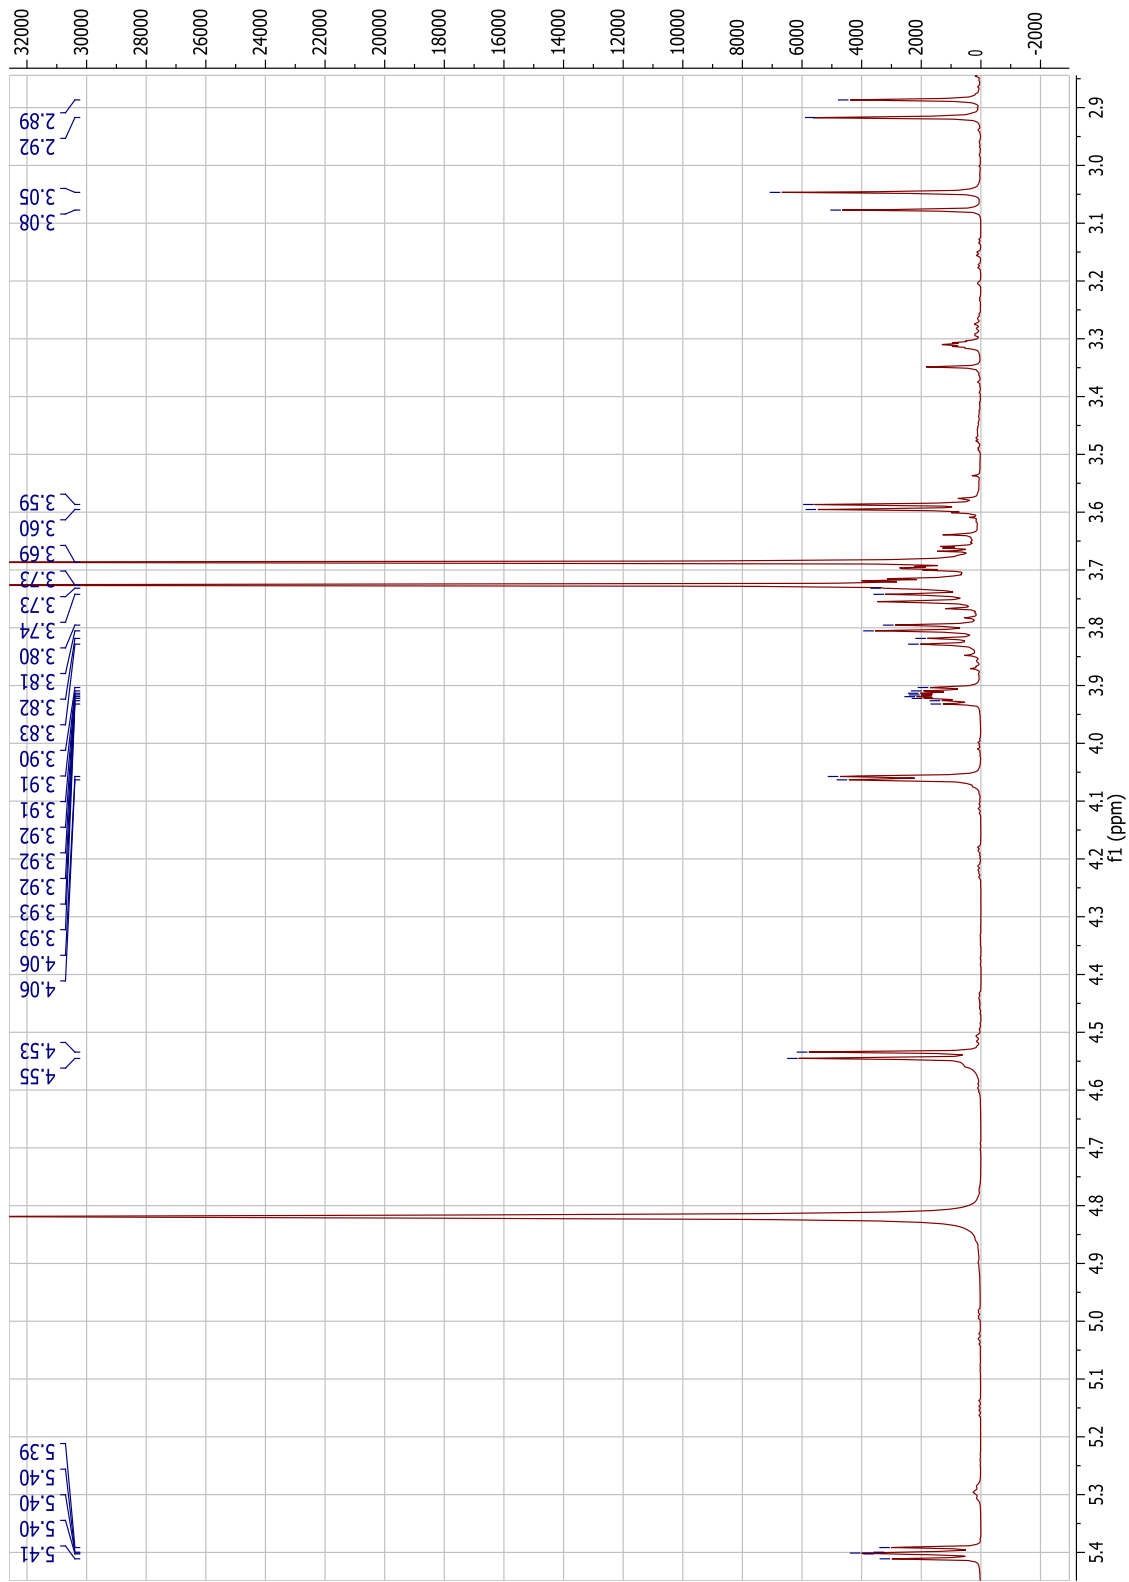

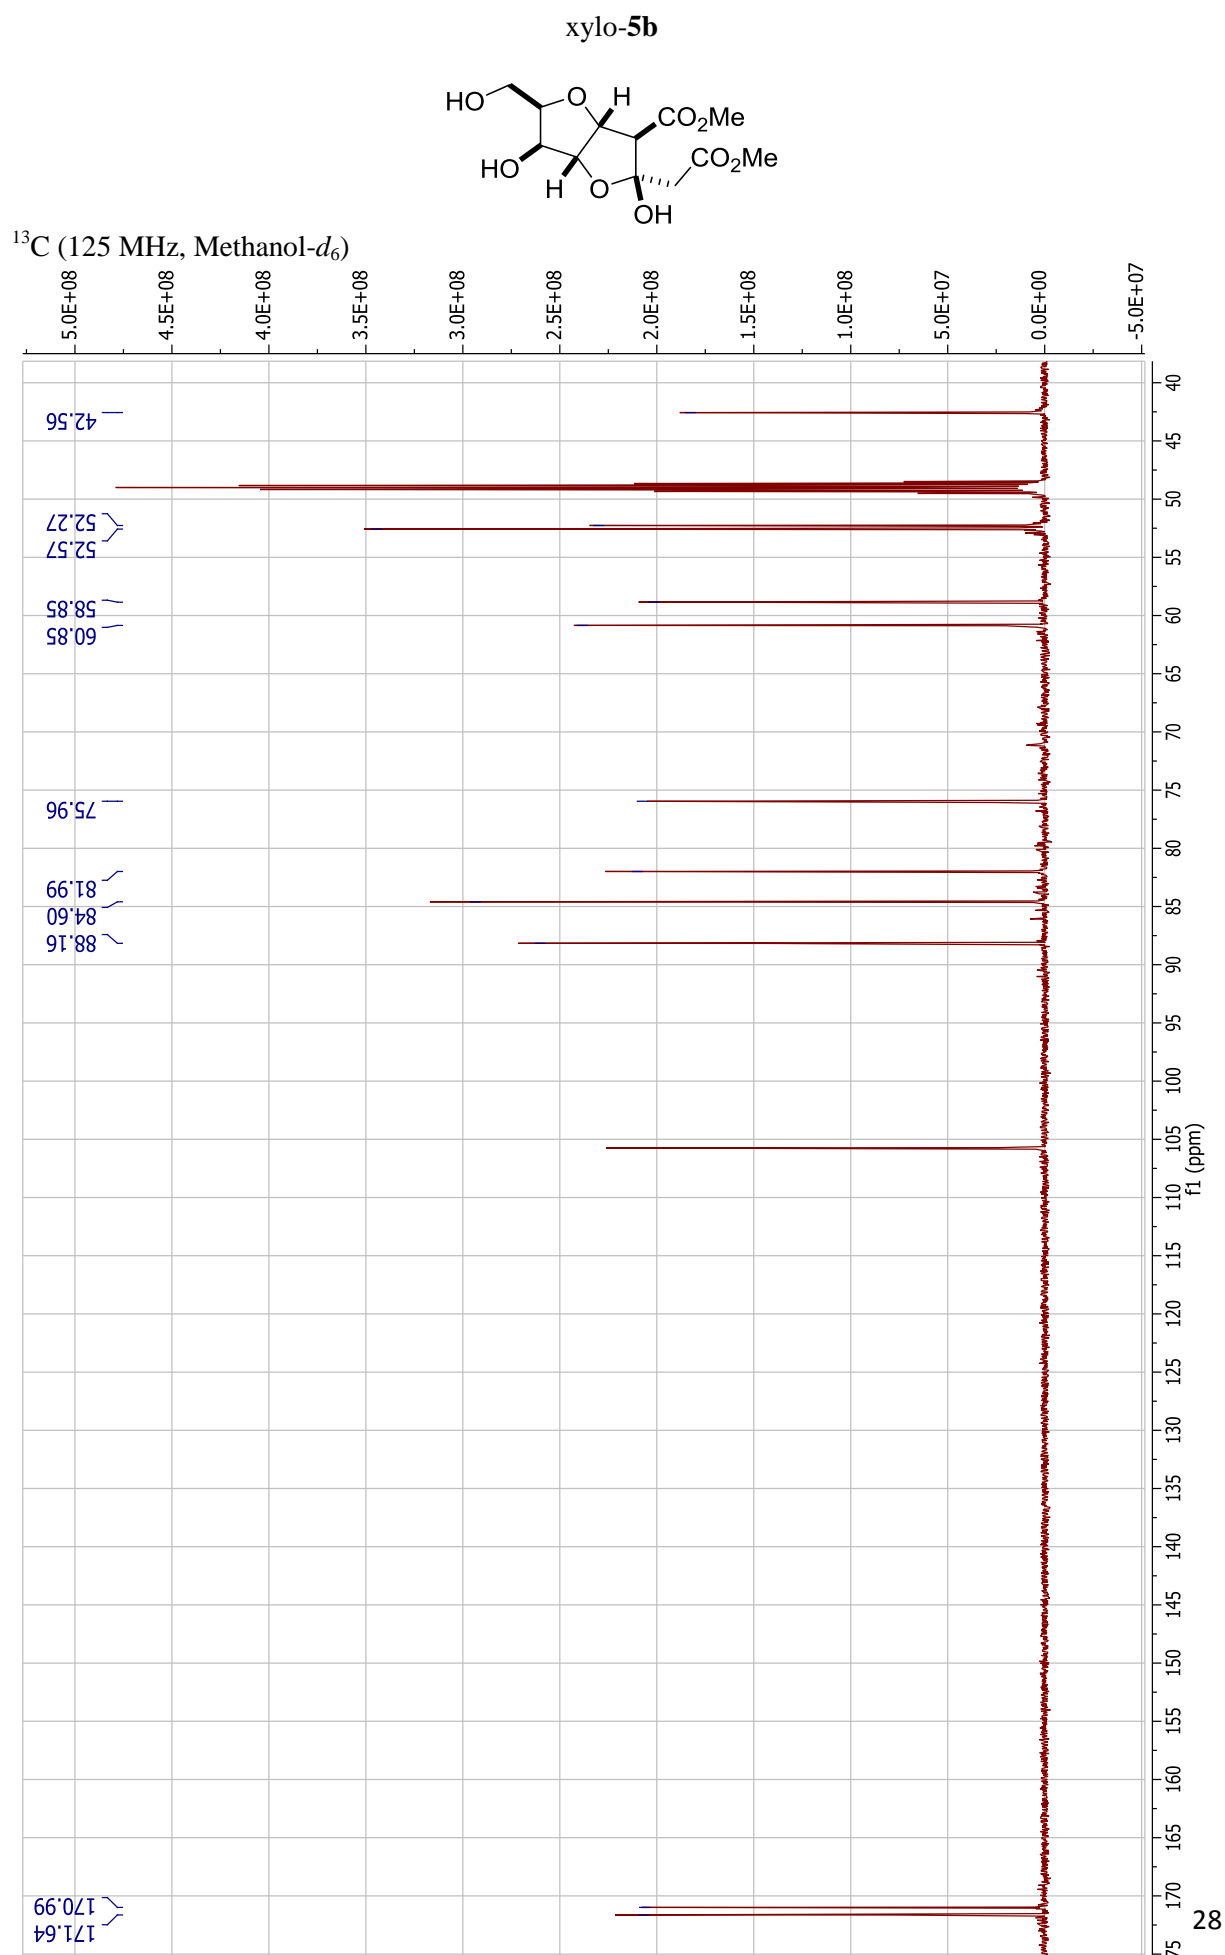

gluco-**6b**

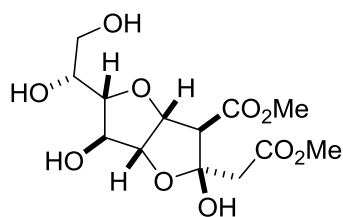

<sup>1</sup>H (500 MHz, Methanol-*d*<sub>6</sub>)

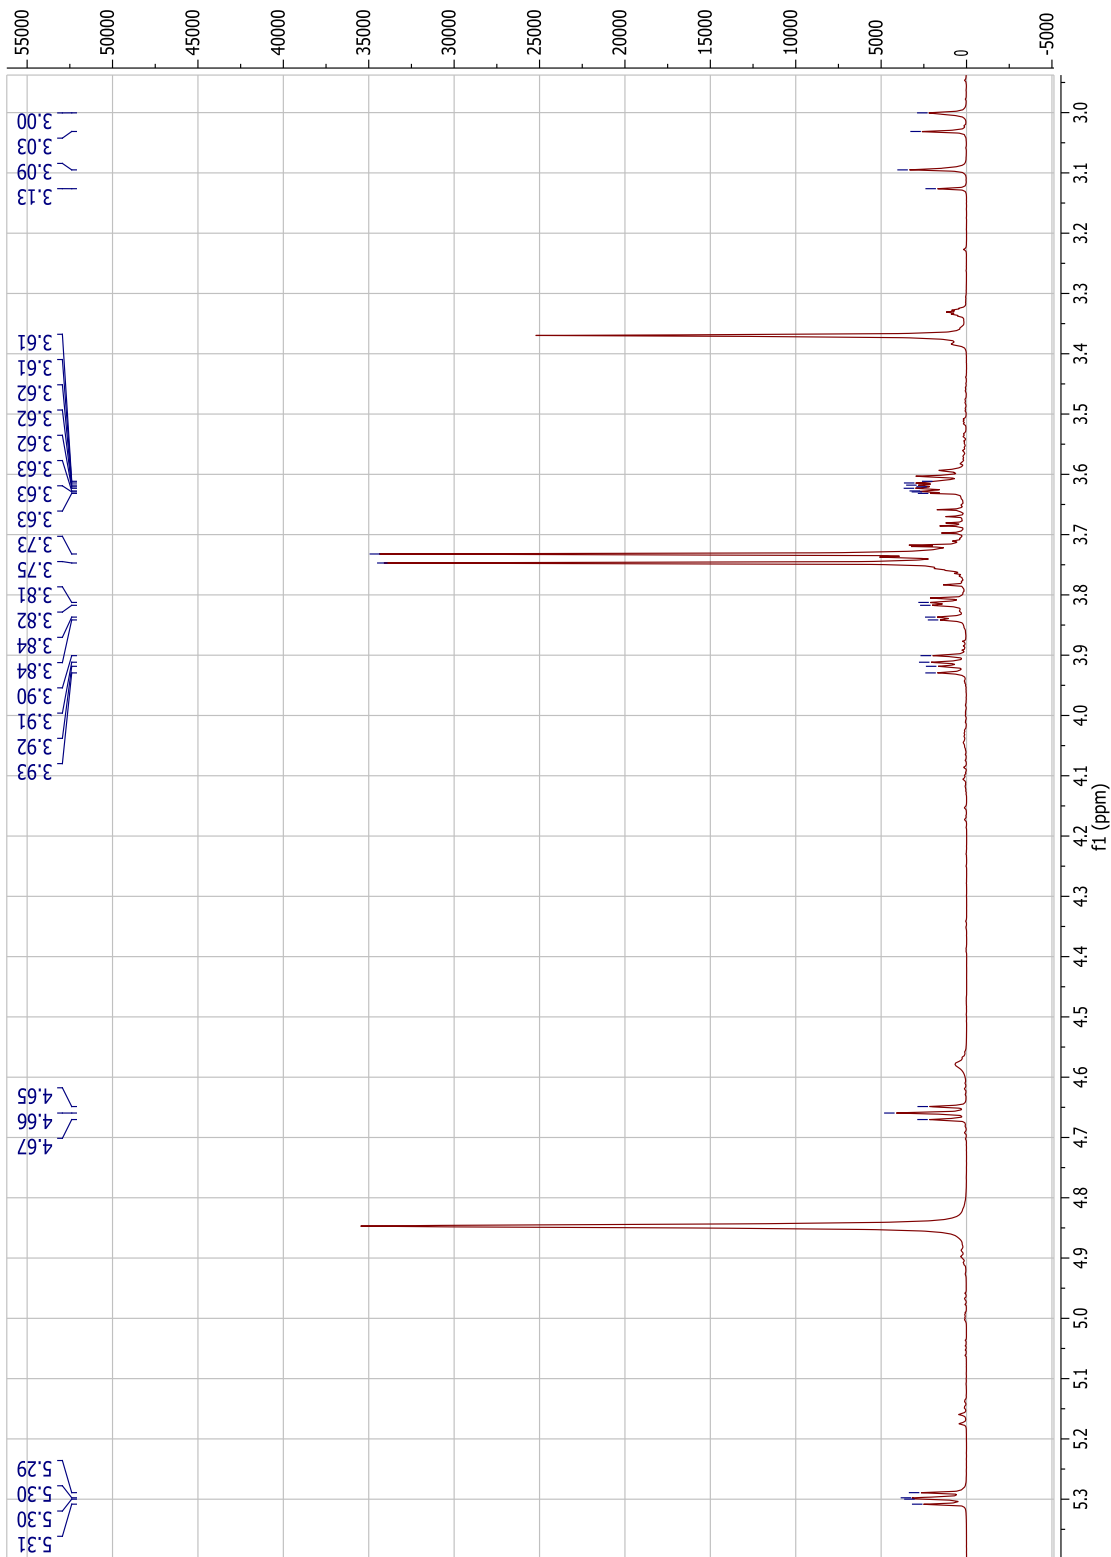

gluco-**6b**

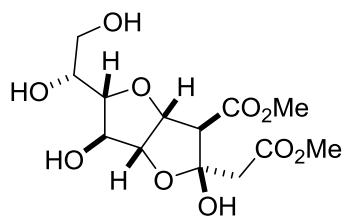

<sup>13</sup>C (125 MHz, Methanol-*d*<sub>6</sub>)

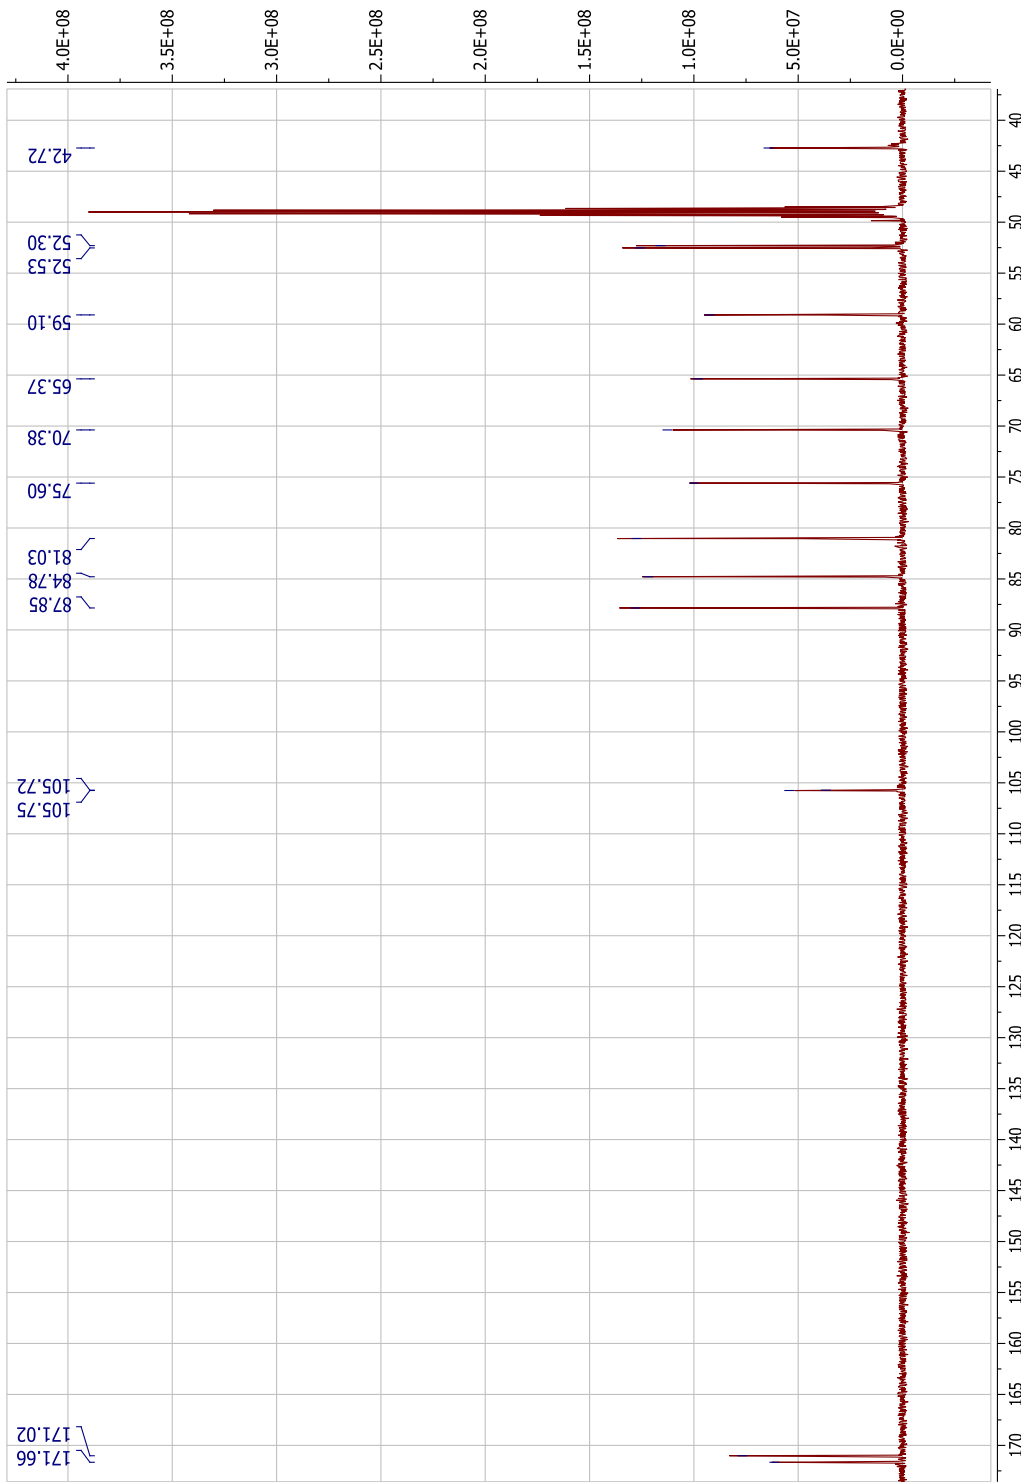

galacto-**7b**

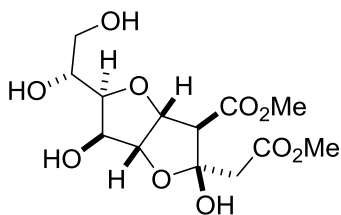

<sup>1</sup>H (500 MHz, Methanol-*d*<sub>6</sub>)

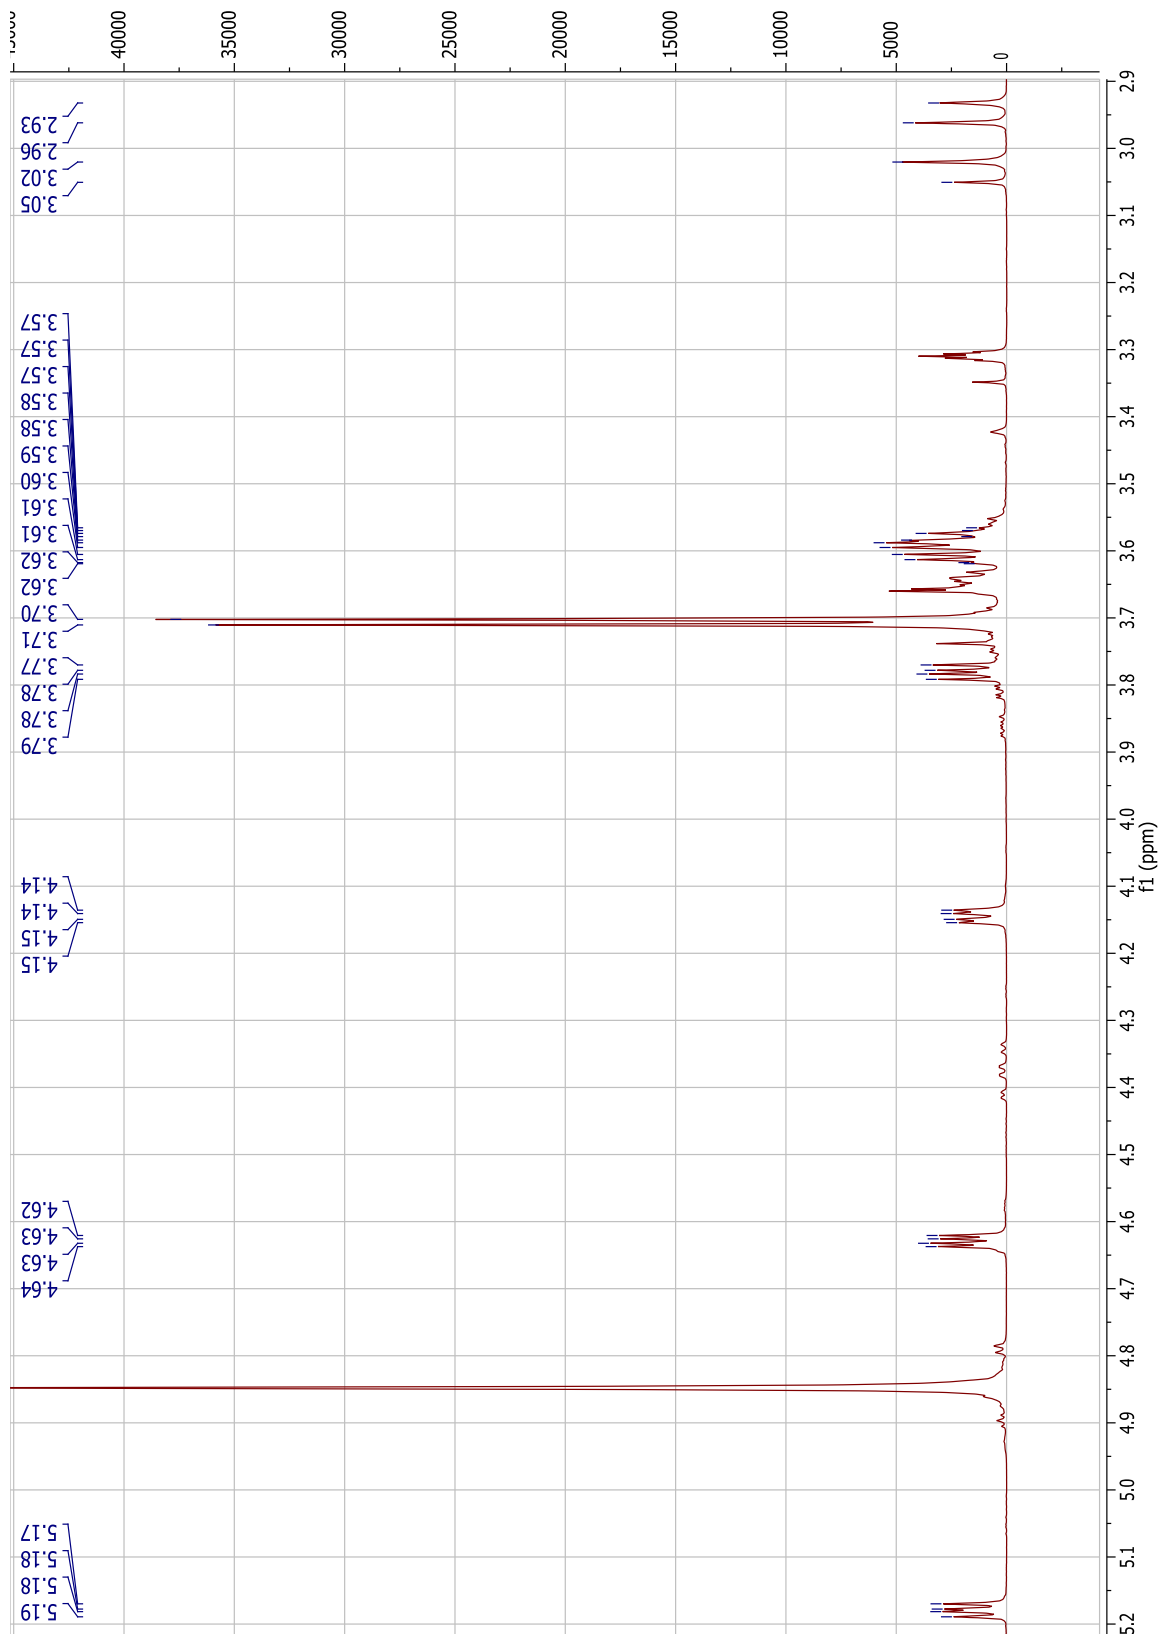

galacto-7b

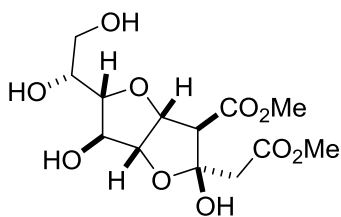

<sup>13</sup>C (125 MHz, Methanol-*d*<sub>6</sub>)

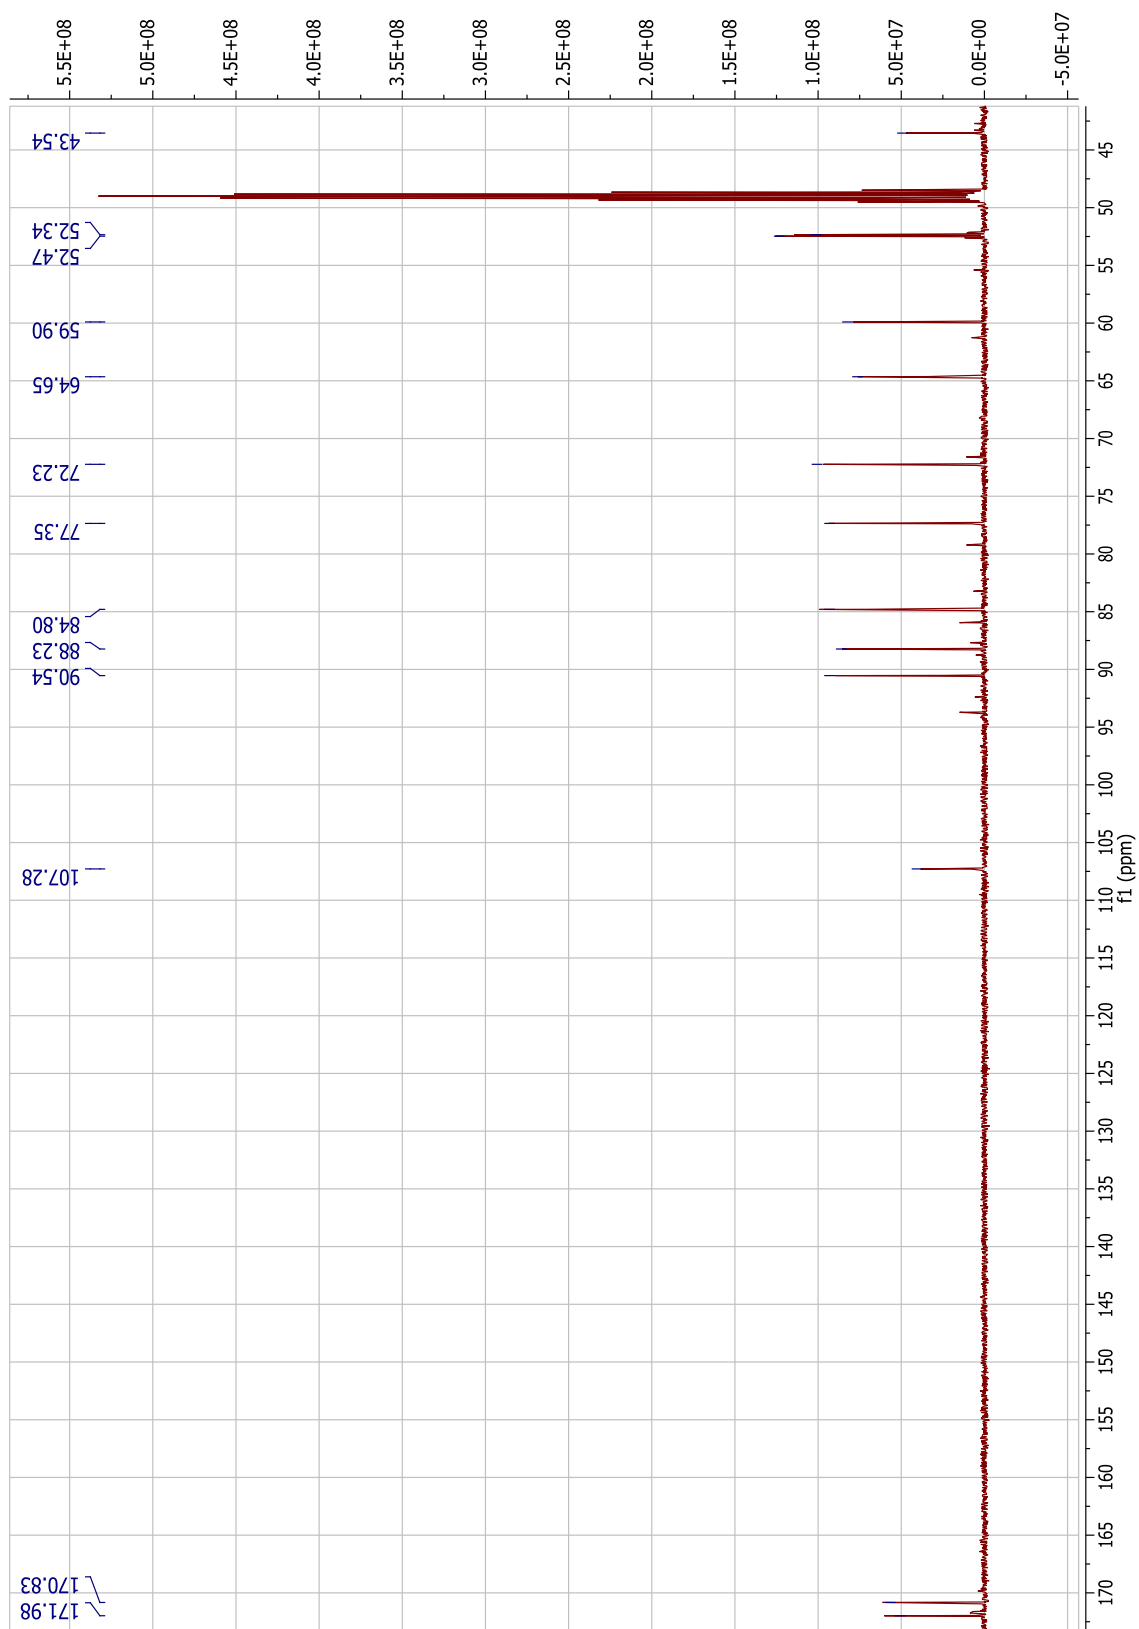

Supplement: c3cc48120d.pdf [file c3cc48120d.pdf]
